# Supplementary material for: Towards more realistic measures of accessibility to emergency departments in Sweden
Source: PubMed Central journal article supplement (PMC10909287; doi:10.1186/s12942-024-00364-9), 2024-03-02
Supplement: 12942_2024_364_MOESM1_ESM.pdf [file 12942_2024_364_MOESM1_ESM.pdf]

Table A1: Descriptive statistics for weekends.

| Time  | Static population (shares) |       |       |       |         | Dynamic population (shares) |       |       |       |         | Difference (Static - Dynamic) |       |       |       |         | Ratio (Static/Dynamic) |        |       |       |         |
|-------|----------------------------|-------|-------|-------|---------|-----------------------------|-------|-------|-------|---------|-------------------------------|-------|-------|-------|---------|------------------------|--------|-------|-------|---------|
|       | 0-10                       | 10-20 | 20-30 | 30-60 | Over 60 | 0-10                        | 10-20 | 20-30 | 30-60 | Over 60 | 0-10                          | 10-20 | 20-30 | 30-60 | Over 60 | 0-10                   | 10-20  | 20-30 | 30-60 | Over 60 |
| 00:00 | 48,0%                      | 26,8% | 13,8% | 10,1% | 1,3%    | 46,6%                       | 25,8% | 14,3% | 11,5% | 1,8%    | 1,4%                          | 1,0%  | -0,5% | -1,4% | -0,6%   | 103,1%                 | 103,8% | 96,8% | 87,9% | 69,8%   |
| 01:00 | 48,0%                      | 26,8% | 13,8% | 10,1% | 1,3%    | 46,5%                       | 25,9% | 14,3% | 11,4% | 1,8%    | 1,5%                          | 0,9%  | -0,5% | -1,3% | -0,5%   | 103,1%                 | 103,4% | 96,6% | 88,3% | 71,1%   |
| 02:00 | 48,0%                      | 26,8% | 13,8% | 10,1% | 1,3%    | 46,0%                       | 26,1% | 14,5% | 11,6% | 1,9%    | 2,0%                          | 0,8%  | -0,7% | -1,5% | -0,6%   | 104,4%                 | 102,9% | 95,2% | 86,8% | 69,5%   |
| 03:00 | 48,0%                      | 26,8% | 13,8% | 10,1% | 1,3%    | 45,7%                       | 26,1% | 14,6% | 11,7% | 1,9%    | 2,3%                          | 0,7%  | -0,8% | -1,6% | -0,6%   | 105,1%                 | 102,6% | 94,6% | 86,1% | 69,2%   |
| 04:00 | 48,0%                      | 26,8% | 13,8% | 10,1% | 1,3%    | 45,4%                       | 26,2% | 14,7% | 11,8% | 1,9%    | 2,6%                          | 0,6%  | -0,9% | -1,7% | -0,6%   | 105,7%                 | 102,3% | 93,9% | 85,5% | 68,8%   |
| 05:00 | 48,0%                      | 26,8% | 13,8% | 10,1% | 1,3%    | 45,3%                       | 26,2% | 14,8% | 11,8% | 1,9%    | 2,7%                          | 0,6%  | -1,0% | -1,7% | -0,6%   | 106,0%                 | 102,2% | 93,5% | 85,2% | 68,6%   |
| 06:00 | 48,0%                      | 26,8% | 13,8% | 10,1% | 1,3%    | 45,3%                       | 26,2% | 14,8% | 11,8% | 1,9%    | 2,7%                          | 0,6%  | -1,0% | -1,8% | -0,6%   | 105,9%                 | 102,5% | 93,5% | 85,1% | 68,2%   |
| 07:00 | 48,0%                      | 26,8% | 13,8% | 10,1% | 1,3%    | 45,3%                       | 26,1% | 14,8% | 11,9% | 1,9%    | 2,7%                          | 0,7%  | -1,0% | -1,8% | -0,6%   | 106,0%                 | 102,6% | 93,4% | 84,8% | 67,6%   |
| 08:00 | 48,0%                      | 26,8% | 13,8% | 10,1% | 1,3%    | 45,2%                       | 26,1% | 14,8% | 11,9% | 1,9%    | 2,8%                          | 0,7%  | -1,0% | -1,9% | -0,6%   | 106,1%                 | 102,8% | 93,2% | 84,4% | 67,3%   |
| 09:00 | 48,0%                      | 26,8% | 13,8% | 10,1% | 1,3%    | 45,5%                       | 25,9% | 14,7% | 12,0% | 1,9%    | 2,5%                          | 0,9%  | -0,9% | -1,9% | -0,6%   | 105,6%                 | 103,6% | 93,6% | 84,2% | 66,5%   |
| 10:00 | 48,0%                      | 26,8% | 13,8% | 10,1% | 1,3%    | 46,0%                       | 25,5% | 14,6% | 12,0% | 1,9%    | 2,0%                          | 1,3%  | -0,8% | -1,9% | -0,7%   | 104,3%                 | 105,2% | 94,7% | 84,3% | 66,2%   |
| 11:00 | 48,0%                      | 26,8% | 13,8% | 10,1% | 1,3%    | 46,6%                       | 25,1% | 14,4% | 11,9% | 1,9%    | 1,4%                          | 1,7%  | -0,6% | -1,8% | -0,7%   | 103,1%                 | 106,7% | 95,8% | 84,5% | 66,3%   |
| 12:00 | 48,0%                      | 26,8% | 13,8% | 10,1% | 1,3%    | 47,0%                       | 24,9% | 14,3% | 11,9% | 1,9%    | 1,0%                          | 1,9%  | -0,5% | -1,8% | -0,6%   | 102,2%                 | 107,8% | 96,4% | 84,8% | 66,5%   |
| 13:00 | 48,0%                      | 26,8% | 13,8% | 10,1% | 1,3%    | 47,2%                       | 24,7% | 14,3% | 11,9% | 1,9%    | 0,8%                          | 2,1%  | -0,5% | -1,8% | -0,6%   | 101,8%                 | 108,4% | 96,6% | 85,0% | 66,8%   |
| 14:00 | 48,0%                      | 26,8% | 13,8% | 10,1% | 1,3%    | 47,2%                       | 24,7% | 14,3% | 11,8% | 1,9%    | 0,8%                          | 2,1%  | -0,5% | -1,8% | -0,6%   | 101,6%                 | 108,4% | 96,8% | 85,2% | 67,2%   |
| 15:00 | 48,0%                      | 26,8% | 13,8% | 10,1% | 1,3%    | 47,1%                       | 24,9% | 14,3% | 11,8% | 1,9%    | 0,9%                          | 1,9%  | -0,5% | -1,7% | -0,6%   | 101,9%                 | 107,7% | 96,6% | 85,4% | 67,4%   |
| 16:00 | 48,0%                      | 26,8% | 13,8% | 10,1% | 1,3%    | 46,9%                       | 25,1% | 14,3% | 11,8% | 1,9%    | 1,1%                          | 1,7%  | -0,5% | -1,7% | -0,6%   | 102,4%                 | 106,8% | 96,3% | 85,6% | 67,5%   |
| 17:00 | 48,0%                      | 26,8% | 13,8% | 10,1% | 1,3%    | 46,7%                       | 25,3% | 14,4% | 11,7% | 1,9%    | 1,3%                          | 1,6%  | -0,5% | -1,7% | -0,6%   | 102,7%                 | 106,2% | 96,2% | 85,9% | 67,8%   |
| 18:00 | 48,0%                      | 26,8% | 13,8% | 10,1% | 1,3%    | 46,5%                       | 25,4% | 14,4% | 11,8% | 1,9%    | 1,5%                          | 1,4%  | -0,6% | -1,7% | -0,6%   | 103,2%                 | 105,6% | 95,9% | 85,7% | 67,7%   |
| 19:00 | 48,0%                      | 26,8% | 13,8% | 10,1% | 1,3%    | 46,4%                       | 25,5% | 14,4% | 11,8% | 1,9%    | 1,6%                          | 1,3%  | -0,6% | -1,7% | -0,6%   | 103,5%                 | 105,1% | 95,7% | 85,6% | 67,7%   |
| 20:00 | 48,0%                      | 26,8% | 13,8% | 10,1% | 1,3%    | 46,3%                       | 25,6% | 14,4% | 11,7% | 1,9%    | 1,7%                          | 1,2%  | -0,6% | -1,7% | -0,6%   | 103,6%                 | 104,8% | 95,8% | 85,8% | 67,9%   |
| 21:00 | 48,0%                      | 26,8% | 13,8% | 10,1% | 1,3%    | 46,3%                       | 25,7% | 14,4% | 11,7% | 1,9%    | 1,7%                          | 1,1%  | -0,6% | -1,6% | -0,6%   | 103,7%                 | 104,4% | 95,7% | 86,0% | 68,1%   |
| 22:00 | 48,0%                      | 26,8% | 13,8% | 10,1% | 1,3%    | 46,3%                       | 25,8% | 14,4% | 11,6% | 1,9%    | 1,7%                          | 1,1%  | -0,6% | -1,6% | -0,6%   | 103,6%                 | 104,1% | 96,0% | 86,6% | 68,8%   |
| 23:00 | 48,0%                      | 26,8% | 13,8% | 10,1% | 1,3%    | 46,5%                       | 25,8% | 14,3% | 11,5% | 1,9%    | 1,5%                          | 1,0%  | -0,5% | -1,5% | -0,6%   | 103,3%                 | 103,9% | 96,4% | 87,3% | 69,5%   |

Table A2: Descriptive statistics for weekdays.

| Time  | Static population (shares) |       |       |       |         | Dynamic population (shares) |       |       |       |         | Difference (Static - Dynamic) |       |       |       |         | Ratio (Static/Dynamic) |        |        |        |         |
|-------|----------------------------|-------|-------|-------|---------|-----------------------------|-------|-------|-------|---------|-------------------------------|-------|-------|-------|---------|------------------------|--------|--------|--------|---------|
|       | 0-10                       | 10-20 | 20-30 | 30-60 | Over 60 | 0-10                        | 10-20 | 20-30 | 30-60 | Over 60 | 0-10                          | 10-20 | 20-30 | 30-60 | Over 60 | 0-10                   | 10-20  | 20-30  | 30-60  | Over 60 |
| 00:00 | 48,0%                      | 26,8% | 13,8% | 10,1% | 1,3%    | 47,3%                       | 26,2% | 14,0% | 10,9% | 1,6%    | 0,7%                          | 0,6%  | -0,2% | -0,8% | -0,3%   | 101,5%                 | 102,2% | 98,5%  | 92,8%  | 80,4%   |
| 01:00 | 48,0%                      | 26,8% | 13,8% | 10,1% | 1,3%    | 47,3%                       | 26,4% | 14,0% | 10,7% | 1,5%    | 0,7%                          | 0,4%  | -0,2% | -0,6% | -0,2%   | 101,4%                 | 101,6% | 98,6%  | 94,0%  | 84,4%   |
| 02:00 | 48,0%                      | 26,8% | 13,8% | 10,1% | 1,3%    | 47,4%                       | 26,6% | 14,0% | 10,6% | 1,5%    | 0,6%                          | 0,2%  | -0,2% | -0,5% | -0,2%   | 101,3%                 | 100,8% | 98,6%  | 95,4%  | 88,0%   |
| 03:00 | 48,0%                      | 26,8% | 13,8% | 10,1% | 1,3%    | 47,2%                       | 26,6% | 14,1% | 10,6% | 1,5%    | 0,8%                          | 0,2%  | -0,2% | -0,6% | -0,2%   | 101,7%                 | 100,8% | 98,2%  | 94,8%  | 87,7%   |
| 04:00 | 48,0%                      | 26,8% | 13,8% | 10,1% | 1,3%    | 47,1%                       | 26,6% | 14,1% | 10,7% | 1,5%    | 0,9%                          | 0,2%  | -0,3% | -0,6% | -0,2%   | 101,9%                 | 100,7% | 97,9%  | 94,3%  | 87,0%   |
| 05:00 | 48,0%                      | 26,8% | 13,8% | 10,1% | 1,3%    | 47,1%                       | 26,6% | 14,1% | 10,7% | 1,5%    | 0,9%                          | 0,2%  | -0,3% | -0,7% | -0,2%   | 102,0%                 | 100,9% | 97,6%  | 93,9%  | 86,4%   |
| 06:00 | 48,0%                      | 26,8% | 13,8% | 10,1% | 1,3%    | 48,1%                       | 26,0% | 13,8% | 10,6% | 1,5%    | -0,1%                         | 0,8%  | 0,0%  | -0,5% | -0,2%   | 99,8%                  | 103,1% | 99,8%  | 95,4%  | 86,7%   |
| 07:00 | 48,0%                      | 26,8% | 13,8% | 10,1% | 1,3%    | 50,8%                       | 24,6% | 13,0% | 10,1% | 1,5%    | -2,8%                         | 2,2%  | 0,8%  | 0,0%  | -0,2%   | 94,5%                  | 108,9% | 105,9% | 99,8%  | 88,4%   |
| 08:00 | 48,0%                      | 26,8% | 13,8% | 10,1% | 1,3%    | 53,1%                       | 23,0% | 12,5% | 9,9%  | 1,5%    | -5,1%                         | 3,8%  | 1,3%  | 0,2%  | -0,2%   | 90,3%                  | 116,5% | 110,4% | 102,1% | 88,7%   |
| 09:00 | 48,0%                      | 26,8% | 13,8% | 10,1% | 1,3%    | 54,0%                       | 22,3% | 12,4% | 9,9%  | 1,5%    | -6,0%                         | 4,5%  | 1,4%  | 0,2%  | -0,2%   | 89,0%                  | 120,3% | 111,6% | 101,8% | 87,2%   |
| 10:00 | 48,0%                      | 26,8% | 13,8% | 10,1% | 1,3%    | 54,6%                       | 21,8% | 12,2% | 9,9%  | 1,5%    | -6,6%                         | 5,0%  | 1,6%  | 0,2%  | -0,2%   | 88,0%                  | 122,7% | 113,1% | 102,1% | 86,5%   |
| 11:00 | 48,0%                      | 26,8% | 13,8% | 10,1% | 1,3%    | 55,2%                       | 21,5% | 12,0% | 9,8%  | 1,5%    | -7,2%                         | 5,3%  | 1,8%  | 0,3%  | -0,2%   | 87,0%                  | 124,7% | 114,7% | 103,0% | 87,0%   |
| 12:00 | 48,0%                      | 26,8% | 13,8% | 10,1% | 1,3%    | 55,4%                       | 21,4% | 12,0% | 9,8%  | 1,5%    | -7,4%                         | 5,4%  | 1,8%  | 0,3%  | -0,2%   | 86,7%                  | 125,4% | 115,1% | 103,2% | 87,1%   |
| 13:00 | 48,0%                      | 26,8% | 13,8% | 10,1% | 1,3%    | 55,0%                       | 21,5% | 12,1% | 9,9%  | 1,5%    | -7,0%                         | 5,3%  | 1,7%  | 0,2%  | -0,2%   | 87,3%                  | 124,7% | 113,9% | 101,9% | 86,0%   |
| 14:00 | 48,0%                      | 26,8% | 13,8% | 10,1% | 1,3%    | 54,5%                       | 21,8% | 12,2% | 10,0% | 1,5%    | -6,5%                         | 5,1%  | 1,6%  | 0,1%  | -0,2%   | 88,0%                  | 123,2% | 112,9% | 101,2% | 85,6%   |
| 15:00 | 48,0%                      | 26,8% | 13,8% | 10,1% | 1,3%    | 53,7%                       | 22,3% | 12,4% | 10,1% | 1,5%    | -5,7%                         | 4,5%  | 1,4%  | 0,0%  | -0,2%   | 89,4%                  | 120,1% | 111,1% | 100,3% | 85,4%   |
| 16:00 | 48,0%                      | 26,8% | 13,8% | 10,1% | 1,3%    | 52,0%                       | 23,3% | 12,9% | 10,3% | 1,5%    | -4,0%                         | 3,5%  | 0,9%  | -0,2% | -0,2%   | 92,4%                  | 115,1% | 107,0% | 97,8%  | 84,6%   |
| 17:00 | 48,0%                      | 26,8% | 13,8% | 10,1% | 1,3%    | 50,3%                       | 24,3% | 13,3% | 10,5% | 1,5%    | -2,3%                         | 2,5%  | 0,5%  | -0,4% | -0,2%   | 95,4%                  | 110,3% | 103,6% | 96,0%  | 83,8%   |
| 18:00 | 48,0%                      | 26,8% | 13,8% | 10,1% | 1,3%    | 49,2%                       | 24,9% | 13,6% | 10,7% | 1,6%    | -1,2%                         | 1,9%  | 0,2%  | -0,6% | -0,3%   | 97,6%                  | 107,6% | 101,3% | 94,1%  | 82,6%   |
| 19:00 | 48,0%                      | 26,8% | 13,8% | 10,1% | 1,3%    | 48,4%                       | 25,3% | 13,8% | 10,9% | 1,6%    | -0,4%                         | 1,5%  | 0,0%  | -0,8% | -0,3%   | 99,3%                  | 105,8% | 99,7%  | 92,8%  | 81,3%   |
| 20:00 | 48,0%                      | 26,8% | 13,8% | 10,1% | 1,3%    | 47,8%                       | 25,6% | 14,0% | 11,0% | 1,6%    | 0,2%                          | 1,2%  | -0,2% | -0,9% | -0,3%   | 100,4%                 | 104,7% | 98,8%  | 91,9%  | 80,4%   |
| 21:00 | 48,0%                      | 26,8% | 13,8% | 10,1% | 1,3%    | 47,5%                       | 25,9% | 14,1% | 11,0% | 1,6%    | 0,5%                          | 1,0%  | -0,2% | -0,9% | -0,3%   | 101,1%                 | 103,7% | 98,3%  | 91,6%  | 80,1%   |
| 22:00 | 48,0%                      | 26,8% | 13,8% | 10,1% | 1,3%    | 47,3%                       | 26,1% | 14,1% | 11,0% | 1,6%    | 0,7%                          | 0,7%  | -0,3% | -0,9% | -0,3%   | 101,6%                 | 102,9% | 98,1%  | 91,8%  | 80,1%   |
| 23:00 | 48,0%                      | 26,8% | 13,8% | 10,1% | 1,3%    | 47,3%                       | 26,2% | 14,0% | 10,9% | 1,6%    | 0,8%                          | 0,6%  | -0,2% | -0,8% | -0,3%   | 101,6%                 | 102,5% | 98,3%  | 92,3%  | 80,3%   |

Table A3: Descriptive statistics for January.

| Time  | Static population (shares) |       |       |       |         | Dynamic population (shares) |       |       |       |         | Difference (Static - Dynamic) |       |       |       |         | Ratio (Static/Dynamic) |        |        |        |         |
|-------|----------------------------|-------|-------|-------|---------|-----------------------------|-------|-------|-------|---------|-------------------------------|-------|-------|-------|---------|------------------------|--------|--------|--------|---------|
|       | 0-10                       | 10-20 | 20-30 | 30-60 | Over 60 | 0-10                        | 10-20 | 20-30 | 30-60 | Over 60 | 0-10                          | 10-20 | 20-30 | 30-60 | Over 60 | 0-10                   | 10-20  | 20-30  | 30-60  | Over 60 |
| 00:00 | 48,0%                      | 26,8% | 13,8% | 10,1% | 1,3%    | 48,2%                       | 26,2% | 13,7% | 10,3% | 1,6%    | -0,2%                         | 0,6%  | 0,1%  | -0,2% | -0,4%   | 99,6%                  | 102,2% | 101,0% | 98,1%  | 78,5%   |
| 01:00 | 48,0%                      | 26,8% | 13,8% | 10,1% | 1,3%    | 48,0%                       | 26,4% | 13,8% | 10,3% | 1,6%    | 0,0%                          | 0,4%  | 0,1%  | -0,2% | -0,3%   | 100,1%                 | 101,4% | 100,4% | 98,3%  | 81,2%   |
| 02:00 | 48,0%                      | 26,8% | 13,8% | 10,1% | 1,3%    | 47,9%                       | 26,5% | 13,8% | 10,3% | 1,6%    | 0,1%                          | 0,4%  | 0,0%  | -0,2% | -0,3%   | 100,3%                 | 101,4% | 100,1% | 97,8%  | 81,3%   |
| 03:00 | 48,0%                      | 26,8% | 13,8% | 10,1% | 1,3%    | 47,7%                       | 26,5% | 13,9% | 10,4% | 1,6%    | 0,3%                          | 0,3%  | -0,1% | -0,3% | -0,3%   | 100,7%                 | 101,2% | 99,6%  | 97,2%  | 81,2%   |
| 04:00 | 48,0%                      | 26,8% | 13,8% | 10,1% | 1,3%    | 47,5%                       | 26,5% | 13,9% | 10,4% | 1,6%    | 0,5%                          | 0,3%  | -0,1% | -0,3% | -0,3%   | 101,0%                 | 101,1% | 99,2%  | 96,7%  | 80,9%   |
| 05:00 | 48,0%                      | 26,8% | 13,8% | 10,1% | 1,3%    | 47,5%                       | 26,5% | 14,0% | 10,5% | 1,6%    | 0,5%                          | 0,3%  | -0,1% | -0,4% | -0,3%   | 101,1%                 | 101,1% | 99,0%  | 96,4%  | 80,7%   |
| 06:00 | 48,0%                      | 26,8% | 13,8% | 10,1% | 1,3%    | 48,0%                       | 26,2% | 13,8% | 10,4% | 1,6%    | 0,0%                          | 0,6%  | 0,0%  | -0,3% | -0,3%   | 99,9%                  | 102,4% | 100,0% | 97,1%  | 81,0%   |
| 07:00 | 48,0%                      | 26,8% | 13,8% | 10,1% | 1,3%    | 49,5%                       | 25,4% | 13,4% | 10,1% | 1,6%    | -1,5%                         | 1,4%  | 0,4%  | -0,1% | -0,3%   | 97,1%                  | 105,4% | 103,1% | 99,4%  | 81,7%   |
| 08:00 | 48,0%                      | 26,8% | 13,8% | 10,1% | 1,3%    | 50,8%                       | 24,5% | 13,1% | 10,0% | 1,6%    | -2,8%                         | 2,3%  | 0,7%  | 0,0%  | -0,3%   | 94,5%                  | 109,4% | 105,4% | 100,5% | 81,7%   |
| 09:00 | 48,0%                      | 26,8% | 13,8% | 10,1% | 1,3%    | 51,3%                       | 24,0% | 13,0% | 10,0% | 1,6%    | -3,3%                         | 2,8%  | 0,8%  | 0,0%  | -0,3%   | 93,5%                  | 111,7% | 106,2% | 100,4% | 80,6%   |
| 10:00 | 48,0%                      | 26,8% | 13,8% | 10,1% | 1,3%    | 51,9%                       | 23,6% | 12,8% | 10,0% | 1,6%    | -3,9%                         | 3,2%  | 1,0%  | 0,1%  | -0,3%   | 92,5%                  | 113,5% | 107,5% | 100,7% | 80,2%   |
| 11:00 | 48,0%                      | 26,8% | 13,8% | 10,1% | 1,3%    | 52,6%                       | 23,3% | 12,6% | 9,9%  | 1,6%    | -4,6%                         | 3,6%  | 1,2%  | 0,2%  | -0,3%   | 91,3%                  | 115,3% | 109,2% | 101,7% | 80,7%   |
| 12:00 | 48,0%                      | 26,8% | 13,8% | 10,1% | 1,3%    | 53,0%                       | 23,0% | 12,5% | 9,8%  | 1,6%    | -5,0%                         | 3,8%  | 1,3%  | 0,2%  | -0,3%   | 90,6%                  | 116,4% | 110,2% | 102,4% | 81,1%   |
| 13:00 | 48,0%                      | 26,8% | 13,8% | 10,1% | 1,3%    | 53,0%                       | 23,0% | 12,5% | 9,9%  | 1,6%    | -5,0%                         | 3,8%  | 1,3%  | 0,2%  | -0,3%   | 90,5%                  | 116,5% | 110,3% | 102,3% | 81,1%   |
| 14:00 | 48,0%                      | 26,8% | 13,8% | 10,1% | 1,3%    | 52,9%                       | 23,1% | 12,5% | 9,8%  | 1,6%    | -4,9%                         | 3,7%  | 1,3%  | 0,2%  | -0,3%   | 90,7%                  | 116,0% | 110,2% | 102,4% | 81,3%   |
| 15:00 | 48,0%                      | 26,8% | 13,8% | 10,1% | 1,3%    | 52,4%                       | 23,5% | 12,6% | 9,9%  | 1,6%    | -4,4%                         | 3,3%  | 1,2%  | 0,2%  | -0,3%   | 91,6%                  | 114,2% | 109,2% | 102,1% | 81,3%   |
| 16:00 | 48,0%                      | 26,8% | 13,8% | 10,1% | 1,3%    | 51,4%                       | 24,1% | 12,9% | 10,0% | 1,6%    | -3,4%                         | 2,7%  | 0,9%  | 0,1%  | -0,3%   | 93,5%                  | 111,2% | 106,8% | 100,7% | 81,3%   |
| 17:00 | 48,0%                      | 26,8% | 13,8% | 10,1% | 1,3%    | 50,3%                       | 24,8% | 13,2% | 10,1% | 1,6%    | -2,3%                         | 2,0%  | 0,6%  | 0,0%  | -0,3%   | 95,4%                  | 108,3% | 104,8% | 99,6%  | 81,1%   |
| 18:00 | 48,0%                      | 26,8% | 13,8% | 10,1% | 1,3%    | 49,5%                       | 25,2% | 13,4% | 10,3% | 1,6%    | -1,5%                         | 1,6%  | 0,4%  | -0,2% | -0,3%   | 97,0%                  | 106,4% | 102,9% | 98,2%  | 80,3%   |
| 19:00 | 48,0%                      | 26,8% | 13,8% | 10,1% | 1,3%    | 48,9%                       | 25,5% | 13,6% | 10,4% | 1,6%    | -0,9%                         | 1,3%  | 0,2%  | -0,3% | -0,3%   | 98,1%                  | 105,1% | 101,8% | 97,3%  | 79,5%   |
| 20:00 | 48,0%                      | 26,8% | 13,8% | 10,1% | 1,3%    | 48,6%                       | 25,7% | 13,6% | 10,4% | 1,6%    | -0,6%                         | 1,1%  | 0,2%  | -0,3% | -0,3%   | 98,8%                  | 104,3% | 101,2% | 96,9%  | 79,2%   |
| 21:00 | 48,0%                      | 26,8% | 13,8% | 10,1% | 1,3%    | 48,3%                       | 25,9% | 13,7% | 10,4% | 1,6%    | -0,3%                         | 0,9%  | 0,1%  | -0,4% | -0,3%   | 99,4%                  | 103,5% | 100,7% | 96,6%  | 78,9%   |
| 22:00 | 48,0%                      | 26,8% | 13,8% | 10,1% | 1,3%    | 48,2%                       | 26,1% | 13,7% | 10,4% | 1,6%    | -0,2%                         | 0,8%  | 0,1%  | -0,3% | -0,3%   | 99,6%                  | 102,9% | 100,7% | 97,1%  | 79,0%   |
| 23:00 | 48,0%                      | 26,8% | 13,8% | 10,1% | 1,3%    | 48,2%                       | 26,1% | 13,7% | 10,3% | 1,6%    | -0,2%                         | 0,7%  | 0,1%  | -0,2% | -0,3%   | 99,5%                  | 102,6% | 101,0% | 97,7%  | 79,1%   |

Table A4: Descriptive statistics for February.

| Time  | Static population (shares) |       |       |       |         | Dynamic population (shares) |       |       |       |         | Difference (Static - Dynamic) |       |       |       |         | Ratio (Static/Dynamic) |        |        |        |         |
|-------|----------------------------|-------|-------|-------|---------|-----------------------------|-------|-------|-------|---------|-------------------------------|-------|-------|-------|---------|------------------------|--------|--------|--------|---------|
|       | 0-10                       | 10-20 | 20-30 | 30-60 | Over 60 | 0-10                        | 10-20 | 20-30 | 30-60 | Over 60 | 0-10                          | 10-20 | 20-30 | 30-60 | Over 60 | 0-10                   | 10-20  | 20-30  | 30-60  | Over 60 |
| 00:00 | 48,0%                      | 26,8% | 13,8% | 10,1% | 1,3%    | 48,1%                       | 26,0% | 13,6% | 10,4% | 1,8%    | -0,1%                         | 0,8%  | 0,2%  | -0,3% | -0,5%   | 99,8%                  | 103,0% | 101,2% | 96,8%  | 70,1%   |
| 01:00 | 48,0%                      | 26,8% | 13,8% | 10,1% | 1,3%    | 48,2%                       | 26,3% | 13,7% | 10,2% | 1,6%    | -0,2%                         | 0,5%  | 0,1%  | -0,2% | -0,3%   | 99,7%                  | 102,0% | 101,0% | 98,5%  | 78,7%   |
| 02:00 | 48,0%                      | 26,8% | 13,8% | 10,1% | 1,3%    | 48,0%                       | 26,3% | 13,7% | 10,3% | 1,6%    | 0,0%                          | 0,5%  | 0,1%  | -0,2% | -0,3%   | 99,9%                  | 102,0% | 100,6% | 97,9%  | 79,0%   |
| 03:00 | 48,0%                      | 26,8% | 13,8% | 10,1% | 1,3%    | 47,8%                       | 26,4% | 13,8% | 10,4% | 1,6%    | 0,2%                          | 0,5%  | 0,0%  | -0,3% | -0,3%   | 100,3%                 | 101,7% | 100,1% | 97,2%  | 78,9%   |
| 04:00 | 48,0%                      | 26,8% | 13,8% | 10,1% | 1,3%    | 47,7%                       | 26,4% | 13,9% | 10,4% | 1,6%    | 0,3%                          | 0,4%  | 0,0%  | -0,3% | -0,3%   | 100,7%                 | 101,6% | 99,7%  | 96,7%  | 78,6%   |
| 05:00 | 48,0%                      | 26,8% | 13,8% | 10,1% | 1,3%    | 47,6%                       | 26,4% | 13,9% | 10,4% | 1,6%    | 0,4%                          | 0,4%  | -0,1% | -0,4% | -0,4%   | 100,8%                 | 101,6% | 99,5%  | 96,5%  | 78,4%   |
| 06:00 | 48,0%                      | 26,8% | 13,8% | 10,1% | 1,3%    | 48,3%                       | 26,0% | 13,7% | 10,4% | 1,6%    | -0,2%                         | 0,8%  | 0,1%  | -0,3% | -0,4%   | 99,5%                  | 103,0% | 100,7% | 97,3%  | 78,4%   |
| 07:00 | 48,0%                      | 26,8% | 13,8% | 10,1% | 1,3%    | 49,8%                       | 25,2% | 13,3% | 10,1% | 1,6%    | -1,8%                         | 1,6%  | 0,6%  | 0,0%  | -0,3%   | 96,3%                  | 106,5% | 104,2% | 99,9%  | 78,9%   |
| 08:00 | 48,0%                      | 26,8% | 13,8% | 10,1% | 1,3%    | 51,3%                       | 24,2% | 12,9% | 10,0% | 1,6%    | -3,3%                         | 2,6%  | 0,9%  | 0,1%  | -0,3%   | 93,6%                  | 110,8% | 106,8% | 101,3% | 78,9%   |
| 09:00 | 48,0%                      | 26,8% | 13,8% | 10,1% | 1,3%    | 51,9%                       | 23,7% | 12,8% | 10,0% | 1,7%    | -3,9%                         | 3,2%  | 1,0%  | 0,1%  | -0,4%   | 92,5%                  | 113,3% | 107,8% | 101,3% | 77,5%   |
| 10:00 | 48,0%                      | 26,8% | 13,8% | 10,1% | 1,3%    | 52,6%                       | 23,2% | 12,6% | 9,9%  | 1,7%    | -4,6%                         | 3,6%  | 1,2%  | 0,2%  | -0,4%   | 91,3%                  | 115,5% | 109,4% | 101,7% | 77,0%   |
| 11:00 | 48,0%                      | 26,8% | 13,8% | 10,1% | 1,3%    | 53,3%                       | 22,8% | 12,4% | 9,8%  | 1,7%    | -5,3%                         | 4,0%  | 1,4%  | 0,3%  | -0,4%   | 90,1%                  | 117,4% | 111,3% | 102,7% | 77,0%   |
| 12:00 | 48,0%                      | 26,8% | 13,8% | 10,1% | 1,3%    | 53,6%                       | 22,6% | 12,3% | 9,8%  | 1,7%    | -5,6%                         | 4,2%  | 1,5%  | 0,3%  | -0,4%   | 89,5%                  | 118,6% | 112,2% | 103,3% | 76,8%   |
| 13:00 | 48,0%                      | 26,8% | 13,8% | 10,1% | 1,3%    | 53,6%                       | 22,6% | 12,3% | 9,8%  | 1,7%    | -5,6%                         | 4,2%  | 1,5%  | 0,3%  | -0,4%   | 89,6%                  | 118,6% | 112,0% | 103,0% | 76,1%   |
| 14:00 | 48,0%                      | 26,8% | 13,8% | 10,1% | 1,3%    | 53,4%                       | 22,7% | 12,4% | 9,8%  | 1,7%    | -5,4%                         | 4,1%  | 1,4%  | 0,3%  | -0,4%   | 89,9%                  | 117,9% | 111,6% | 102,9% | 75,7%   |
| 15:00 | 48,0%                      | 26,8% | 13,8% | 10,1% | 1,3%    | 52,8%                       | 23,1% | 12,5% | 9,8%  | 1,7%    | -4,8%                         | 3,7%  | 1,3%  | 0,2%  | -0,4%   | 91,0%                  | 115,9% | 110,4% | 102,4% | 74,8%   |
| 16:00 | 48,0%                      | 26,8% | 13,8% | 10,1% | 1,3%    | 51,6%                       | 23,8% | 12,8% | 10,0% | 1,7%    | -3,6%                         | 3,0%  | 1,0%  | 0,1%  | -0,5%   | 93,0%                  | 112,6% | 107,6% | 100,7% | 73,8%   |
| 17:00 | 48,0%                      | 26,8% | 13,8% | 10,1% | 1,3%    | 50,5%                       | 24,5% | 13,1% | 10,1% | 1,8%    | -2,5%                         | 2,3%  | 0,7%  | -0,1% | -0,5%   | 95,0%                  | 109,6% | 105,5% | 99,5%  | 73,0%   |
| 18:00 | 48,0%                      | 26,8% | 13,8% | 10,1% | 1,3%    | 49,7%                       | 24,9% | 13,3% | 10,3% | 1,8%    | -1,7%                         | 1,9%  | 0,5%  | -0,2% | -0,5%   | 96,5%                  | 107,7% | 103,8% | 98,1%  | 72,0%   |
| 19:00 | 48,0%                      | 26,8% | 13,8% | 10,1% | 1,3%    | 49,7%                       | 24,9% | 13,3% | 10,3% | 1,8%    | -1,7%                         | 1,9%  | 0,5%  | -0,2% | -0,5%   | 96,5%                  | 107,7% | 103,8% | 98,1%  | 72,0%   |
| 20:00 | 48,0%                      | 26,8% | 13,8% | 10,1% | 1,3%    | 48,7%                       | 25,4% | 13,6% | 10,4% | 1,8%    | -0,7%                         | 1,4%  | 0,3%  | -0,4% | -0,5%   | 98,5%                  | 105,4% | 101,9% | 96,5%  | 70,6%   |
| 21:00 | 48,0%                      | 26,8% | 13,8% | 10,1% | 1,3%    | 48,4%                       | 25,6% | 13,6% | 10,5% | 1,8%    | -0,4%                         | 1,2%  | 0,2%  | -0,4% | -0,5%   | 99,1%                  | 104,6% | 101,4% | 96,2%  | 70,4%   |
| 22:00 | 48,0%                      | 26,8% | 13,8% | 10,1% | 1,3%    | 48,3%                       | 25,8% | 13,6% | 10,4% | 1,8%    | -0,3%                         | 1,0%  | 0,2%  | -0,4% | -0,5%   | 99,4%                  | 103,9% | 101,3% | 96,6%  | 70,4%   |
| 23:00 | 48,0%                      | 26,8% | 13,8% | 10,1% | 1,3%    | 48,3%                       | 25,8% | 13,6% | 10,4% | 1,8%    | -0,3%                         | 1,0%  | 0,2%  | -0,4% | -0,5%   | 99,4%                  | 103,9% | 101,3% | 96,6%  | 70,4%   |

Table A5: Descriptive statistics for March.

| Time  | Static population (shares) |       |       |       |         | Dynamic population (shares) |       |       |       |         | Difference (Static - Dynamic) |       |       |       |         | Ratio (Static/Dynamic) |        |        |       |         |
|-------|----------------------------|-------|-------|-------|---------|-----------------------------|-------|-------|-------|---------|-------------------------------|-------|-------|-------|---------|------------------------|--------|--------|-------|---------|
|       | 0-10                       | 10-20 | 20-30 | 30-60 | Over 60 | 0-10                        | 10-20 | 20-30 | 30-60 | Over 60 | 0-10                          | 10-20 | 20-30 | 30-60 | Over 60 | 0-10                   | 10-20  | 20-30  | 30-60 | Over 60 |
| 00:00 | 48,0%                      | 26,8% | 13,8% | 10,1% | 1,3%    | 47,7%                       | 26,2% | 13,8% | 10,5% | 1,8%    | 0,3%                          | 0,6%  | 0,1%  | -0,4% | -0,5%   | 100,6%                 | 102,4% | 100,4% | 95,8% | 70,3%   |
| 01:00 | 48,0%                      | 26,8% | 13,8% | 10,1% | 1,3%    | 47,7%                       | 26,2% | 13,8% | 10,5% | 1,8%    | 0,3%                          | 0,6%  | 0,1%  | -0,4% | -0,5%   | 100,6%                 | 102,4% | 100,4% | 95,8% | 70,3%   |
| 02:00 | 48,0%                      | 26,8% | 13,8% | 10,1% | 1,3%    | 47,5%                       | 26,4% | 13,9% | 10,5% | 1,7%    | 0,5%                          | 0,5%  | -0,1% | -0,4% | -0,5%   | 101,0%                 | 101,8% | 99,5%  | 96,0% | 73,7%   |
| 03:00 | 48,0%                      | 26,8% | 13,8% | 10,1% | 1,3%    | 47,3%                       | 26,4% | 14,0% | 10,6% | 1,8%    | 0,7%                          | 0,4%  | -0,2% | -0,5% | -0,5%   | 101,5%                 | 101,6% | 98,8%  | 95,1% | 73,6%   |
| 04:00 | 48,0%                      | 26,8% | 13,8% | 10,1% | 1,3%    | 47,1%                       | 26,4% | 14,0% | 10,7% | 1,8%    | 0,9%                          | 0,4%  | -0,2% | -0,6% | -0,5%   | 101,9%                 | 101,5% | 98,4%  | 94,5% | 73,2%   |
| 05:00 | 48,0%                      | 26,8% | 13,8% | 10,1% | 1,3%    | 47,1%                       | 26,4% | 14,1% | 10,7% | 1,8%    | 0,9%                          | 0,4%  | -0,3% | -0,6% | -0,5%   | 102,0%                 | 101,6% | 98,2%  | 94,3% | 73,0%   |
| 06:00 | 48,0%                      | 26,8% | 13,8% | 10,1% | 1,3%    | 47,6%                       | 26,1% | 13,9% | 10,6% | 1,8%    | 0,4%                          | 0,7%  | -0,1% | -0,5% | -0,5%   | 100,8%                 | 102,8% | 99,3%  | 95,0% | 73,3%   |
| 07:00 | 48,0%                      | 26,8% | 13,8% | 10,1% | 1,3%    | 49,1%                       | 25,3% | 13,5% | 10,4% | 1,7%    | -1,1%                         | 1,5%  | 0,3%  | -0,3% | -0,5%   | 97,8%                  | 105,9% | 102,4% | 97,4% | 73,9%   |
| 08:00 | 48,0%                      | 26,8% | 13,8% | 10,1% | 1,3%    | 50,3%                       | 24,5% | 13,2% | 10,2% | 1,7%    | -2,3%                         | 2,4%  | 0,6%  | -0,2% | -0,5%   | 95,4%                  | 109,6% | 104,5% | 98,4% | 73,6%   |
| 09:00 | 48,0%                      | 26,8% | 13,8% | 10,1% | 1,3%    | 50,8%                       | 24,0% | 13,1% | 10,3% | 1,8%    | -2,8%                         | 2,8%  | 0,7%  | -0,2% | -0,5%   | 94,4%                  | 111,7% | 105,3% | 98,3% | 72,5%   |
| 10:00 | 48,0%                      | 26,8% | 13,8% | 10,1% | 1,3%    | 51,4%                       | 23,7% | 13,0% | 10,2% | 1,8%    | -3,4%                         | 3,2%  | 0,8%  | -0,2% | -0,5%   | 93,5%                  | 113,4% | 106,5% | 98,5% | 72,2%   |
| 11:00 | 48,0%                      | 26,8% | 13,8% | 10,1% | 1,3%    | 51,9%                       | 23,4% | 12,8% | 10,2% | 1,8%    | -3,9%                         | 3,4%  | 1,0%  | -0,1% | -0,5%   | 92,6%                  | 114,8% | 107,7% | 99,1% | 72,7%   |
| 12:00 | 48,0%                      | 26,8% | 13,8% | 10,1% | 1,3%    | 52,1%                       | 23,2% | 12,8% | 10,2% | 1,8%    | -4,1%                         | 3,6%  | 1,0%  | -0,1% | -0,5%   | 92,2%                  | 115,4% | 108,1% | 99,3% | 73,0%   |
| 13:00 | 48,0%                      | 26,8% | 13,8% | 10,1% | 1,3%    | 51,9%                       | 23,3% | 12,8% | 10,2% | 1,8%    | -3,9%                         | 3,5%  | 1,0%  | -0,1% | -0,5%   | 92,5%                  | 115,2% | 107,6% | 98,8% | 72,8%   |
| 14:00 | 48,0%                      | 26,8% | 13,8% | 10,1% | 1,3%    | 51,7%                       | 23,4% | 12,9% | 10,2% | 1,8%    | -3,7%                         | 3,4%  | 0,9%  | -0,1% | -0,5%   | 92,8%                  | 114,5% | 107,3% | 98,7% | 73,0%   |
| 15:00 | 48,0%                      | 26,8% | 13,8% | 10,1% | 1,3%    | 51,2%                       | 23,8% | 13,0% | 10,2% | 1,8%    | -3,2%                         | 3,0%  | 0,8%  | -0,2% | -0,5%   | 93,7%                  | 112,8% | 106,4% | 98,4% | 73,0%   |
| 16:00 | 48,0%                      | 26,8% | 13,8% | 10,1% | 1,3%    | 50,3%                       | 24,3% | 13,3% | 10,4% | 1,8%    | -2,3%                         | 2,5%  | 0,6%  | -0,3% | -0,5%   | 95,5%                  | 110,1% | 104,2% | 97,3% | 72,8%   |
| 17:00 | 48,0%                      | 26,8% | 13,8% | 10,1% | 1,3%    | 49,4%                       | 24,9% | 13,5% | 10,5% | 1,8%    | -1,4%                         | 1,9%  | 0,3%  | -0,4% | -0,5%   | 97,3%                  | 107,5% | 102,5% | 96,4% | 72,5%   |
| 18:00 | 48,0%                      | 26,8% | 13,8% | 10,1% | 1,3%    | 48,7%                       | 25,3% | 13,7% | 10,6% | 1,8%    | -0,7%                         | 1,5%  | 0,2%  | -0,5% | -0,5%   | 98,6%                  | 106,0% | 101,2% | 95,4% | 72,0%   |
| 19:00 | 48,0%                      | 26,8% | 13,8% | 10,1% | 1,3%    | 48,2%                       | 25,6% | 13,8% | 10,7% | 1,8%    | -0,2%                         | 1,3%  | 0,0%  | -0,6% | -0,5%   | 99,6%                  | 104,9% | 100,3% | 94,6% | 71,4%   |
| 20:00 | 48,0%                      | 26,8% | 13,8% | 10,1% | 1,3%    | 47,9%                       | 25,7% | 13,8% | 10,7% | 1,8%    | 0,1%                          | 1,1%  | 0,0%  | -0,6% | -0,5%   | 100,2%                 | 104,2% | 99,8%  | 94,3% | 71,0%   |
| 21:00 | 48,0%                      | 26,8% | 13,8% | 10,1% | 1,3%    | 47,7%                       | 25,9% | 13,9% | 10,7% | 1,8%    | 0,3%                          | 0,9%  | -0,1% | -0,6% | -0,5%   | 100,6%                 | 103,6% | 99,5%  | 94,2% | 70,8%   |
| 22:00 | 48,0%                      | 26,8% | 13,8% | 10,1% | 1,3%    | 47,6%                       | 26,0% | 13,9% | 10,7% | 1,8%    | 0,4%                          | 0,8%  | -0,1% | -0,6% | -0,5%   | 100,8%                 | 103,0% | 99,6%  | 94,6% | 70,9%   |
| 23:00 | 48,0%                      | 26,8% | 13,8% | 10,1% | 1,3%    | 47,7%                       | 26,1% | 13,8% | 10,6% | 1,8%    | 0,3%                          | 0,7%  | 0,0%  | -0,5% | -0,5%   | 100,7%                 | 102,8% | 100,0% | 95,1% | 70,9%   |

Table A6: Descriptive statistics for April.

| Time  | Static population (shares) |       |       |       |         | Dynamic population (shares) |       |       |       |         | Difference (Static - Dynamic) |       |       |       |         | Ratio (Static/Dynamic) |        |        |       |         |
|-------|----------------------------|-------|-------|-------|---------|-----------------------------|-------|-------|-------|---------|-------------------------------|-------|-------|-------|---------|------------------------|--------|--------|-------|---------|
|       | 0-10                       | 10-20 | 20-30 | 30-60 | Over 60 | 0-10                        | 10-20 | 20-30 | 30-60 | Over 60 | 0-10                          | 10-20 | 20-30 | 30-60 | Over 60 | 0-10                   | 10-20  | 20-30  | 30-60 | Over 60 |
| 00:00 | 48,0%                      | 26,8% | 13,8% | 10,1% | 1,3%    | 46,2%                       | 26,1% | 14,4% | 11,3% | 1,9%    | 1,8%                          | 0,7%  | -0,6% | -1,2% | -0,6%   | 103,8%                 | 102,6% | 95,8%  | 89,1% | 68,1%   |
| 01:00 | 48,0%                      | 26,8% | 13,8% | 10,1% | 1,3%    | 46,2%                       | 26,2% | 14,4% | 11,3% | 1,9%    | 1,8%                          | 0,6%  | -0,6% | -1,2% | -0,6%   | 103,9%                 | 102,2% | 95,9%  | 89,5% | 68,6%   |
| 02:00 | 48,0%                      | 26,8% | 13,8% | 10,1% | 1,3%    | 46,0%                       | 26,5% | 14,5% | 11,2% | 1,8%    | 2,0%                          | 0,3%  | -0,7% | -1,1% | -0,5%   | 104,3%                 | 101,3% | 95,3%  | 90,3% | 70,2%   |
| 03:00 | 48,0%                      | 26,8% | 13,8% | 10,1% | 1,3%    | 45,9%                       | 26,5% | 14,5% | 11,2% | 1,8%    | 2,1%                          | 0,3%  | -0,7% | -1,1% | -0,5%   | 104,6%                 | 101,2% | 95,0%  | 89,8% | 70,2%   |
| 04:00 | 48,0%                      | 26,8% | 13,8% | 10,1% | 1,3%    | 45,7%                       | 26,5% | 14,6% | 11,3% | 1,8%    | 2,3%                          | 0,3%  | -0,8% | -1,2% | -0,6%   | 105,0%                 | 101,1% | 94,5%  | 89,3% | 69,9%   |
| 05:00 | 48,0%                      | 26,8% | 13,8% | 10,1% | 1,3%    | 45,6%                       | 26,5% | 14,7% | 11,3% | 1,8%    | 2,4%                          | 0,3%  | -0,9% | -1,3% | -0,6%   | 105,2%                 | 101,1% | 94,1%  | 88,9% | 69,7%   |
| 06:00 | 48,0%                      | 26,8% | 13,8% | 10,1% | 1,3%    | 46,2%                       | 26,2% | 14,5% | 11,3% | 1,8%    | 1,8%                          | 0,7%  | -0,7% | -1,2% | -0,6%   | 103,8%                 | 102,5% | 95,3%  | 89,6% | 70,0%   |
| 07:00 | 48,0%                      | 26,8% | 13,8% | 10,1% | 1,3%    | 47,7%                       | 25,4% | 14,1% | 11,0% | 1,8%    | 0,3%                          | 1,4%  | -0,3% | -0,9% | -0,5%   | 100,6%                 | 105,6% | 98,2%  | 91,6% | 70,2%   |
| 08:00 | 48,0%                      | 26,8% | 13,8% | 10,1% | 1,3%    | 48,9%                       | 24,5% | 13,8% | 10,9% | 1,9%    | -0,9%                         | 2,3%  | 0,0%  | -0,9% | -0,6%   | 98,2%                  | 109,4% | 100,1% | 92,2% | 69,4%   |
| 09:00 | 48,0%                      | 26,8% | 13,8% | 10,1% | 1,3%    | 49,4%                       | 24,0% | 13,7% | 11,0% | 1,9%    | -1,4%                         | 2,8%  | 0,1%  | -0,9% | -0,6%   | 97,2%                  | 111,6% | 100,9% | 91,8% | 67,5%   |
| 10:00 | 48,0%                      | 26,8% | 13,8% | 10,1% | 1,3%    | 49,9%                       | 23,6% | 13,5% | 11,0% | 1,9%    | -1,9%                         | 3,2%  | 0,3%  | -0,9% | -0,7%   | 96,1%                  | 113,5% | 102,2% | 91,9% | 66,2%   |
| 11:00 | 48,0%                      | 26,8% | 13,8% | 10,1% | 1,3%    | 50,5%                       | 23,3% | 13,4% | 10,9% | 1,9%    | -2,5%                         | 3,5%  | 0,4%  | -0,8% | -0,7%   | 95,1%                  | 115,1% | 103,3% | 92,3% | 66,1%   |
| 12:00 | 48,0%                      | 26,8% | 13,8% | 10,1% | 1,3%    | 50,6%                       | 23,2% | 13,3% | 10,9% | 1,9%    | -2,6%                         | 3,7%  | 0,5%  | -0,8% | -0,7%   | 94,8%                  | 115,8% | 103,5% | 92,3% | 66,3%   |
| 13:00 | 48,0%                      | 26,8% | 13,8% | 10,1% | 1,3%    | 50,4%                       | 23,2% | 13,4% | 11,0% | 1,9%    | -2,4%                         | 3,6%  | 0,4%  | -0,9% | -0,7%   | 95,2%                  | 115,5% | 102,8% | 91,7% | 66,2%   |
| 14:00 | 48,0%                      | 26,8% | 13,8% | 10,1% | 1,3%    | 50,2%                       | 23,4% | 13,5% | 11,0% | 1,9%    | -2,2%                         | 3,5%  | 0,3%  | -0,9% | -0,7%   | 95,7%                  | 114,8% | 102,4% | 91,4% | 66,3%   |
| 15:00 | 48,0%                      | 26,8% | 13,8% | 10,1% | 1,3%    | 49,7%                       | 23,7% | 13,6% | 11,1% | 1,9%    | -1,7%                         | 3,1%  | 0,2%  | -1,0% | -0,6%   | 96,6%                  | 113,1% | 101,7% | 91,1% | 66,7%   |
| 16:00 | 48,0%                      | 26,8% | 13,8% | 10,1% | 1,3%    | 48,8%                       | 24,3% | 13,8% | 11,2% | 1,9%    | -0,8%                         | 2,5%  | 0,0%  | -1,1% | -0,6%   | 98,4%                  | 110,4% | 99,8%  | 90,2% | 66,9%   |
| 17:00 | 48,0%                      | 26,8% | 13,8% | 10,1% | 1,3%    | 47,9%                       | 24,9% | 14,1% | 11,3% | 1,9%    | 0,1%                          | 1,9%  | -0,2% | -1,2% | -0,6%   | 100,3%                 | 107,7% | 98,3%  | 89,6% | 66,9%   |
| 18:00 | 48,0%                      | 26,8% | 13,8% | 10,1% | 1,3%    | 47,2%                       | 25,3% | 14,2% | 11,4% | 1,9%    | 0,8%                          | 1,6%  | -0,4% | -1,3% | -0,6%   | 101,7%                 | 106,1% | 97,1%  | 88,7% | 66,6%   |
| 19:00 | 48,0%                      | 26,8% | 13,8% | 10,1% | 1,3%    | 46,7%                       | 25,5% | 14,3% | 11,5% | 1,9%    | 1,3%                          | 1,3%  | -0,5% | -1,4% | -0,7%   | 102,7%                 | 105,1% | 96,4%  | 88,0% | 66,1%   |
| 20:00 | 48,0%                      | 26,8% | 13,8% | 10,1% | 1,3%    | 46,5%                       | 25,7% | 14,4% | 11,5% | 2,0%    | 1,5%                          | 1,1%  | -0,6% | -1,4% | -0,7%   | 103,3%                 | 104,3% | 95,9%  | 87,8% | 66,0%   |
| 21:00 | 48,0%                      | 26,8% | 13,8% | 10,1% | 1,3%    | 46,3%                       | 25,9% | 14,4% | 11,5% | 1,9%    | 1,7%                          | 1,0%  | -0,6% | -1,4% | -0,7%   | 103,7%                 | 103,7% | 95,7%  | 87,9% | 66,0%   |
| 22:00 | 48,0%                      | 26,8% | 13,8% | 10,1% | 1,3%    | 46,2%                       | 26,0% | 14,5% | 11,5% | 1,9%    | 1,9%                          | 0,8%  | -0,6% | -1,4% | -0,6%   | 104,0%                 | 103,1% | 95,5%  | 88,0% | 66,6%   |
| 23:00 | 48,0%                      | 26,8% | 13,8% | 10,1% | 1,3%    | 46,2%                       | 26,1% | 14,4% | 11,4% | 1,9%    | 1,8%                          | 0,7%  | -0,6% | -1,3% | -0,6%   | 103,9%                 | 102,8% | 95,7%  | 88,6% | 67,4%   |

Table A7: Descriptive statistics for May.

| Time  | Static population (shares) |       |       |       |         | Dynamic population (shares) |       |       |       |         | Difference (Static - Dynamic) |       |       |       |         | Ratio (Static/Dynamic) |        |        |       |         |
|-------|----------------------------|-------|-------|-------|---------|-----------------------------|-------|-------|-------|---------|-------------------------------|-------|-------|-------|---------|------------------------|--------|--------|-------|---------|
|       | 0-10                       | 10-20 | 20-30 | 30-60 | Over 60 | 0-10                        | 10-20 | 20-30 | 30-60 | Over 60 | 0-10                          | 10-20 | 20-30 | 30-60 | Over 60 | 0-10                   | 10-20  | 20-30  | 30-60 | Over 60 |
| 00:00 | 48,0%                      | 26,8% | 13,8% | 10,1% | 1,3%    | 47,1%                       | 26,2% | 14,3% | 11,1% | 1,4%    | 0,9%                          | 0,6%  | -0,4% | -1,0% | -0,1%   | 102,0%                 | 102,4% | 96,9%  | 90,9% | 91,6%   |
| 01:00 | 48,0%                      | 26,8% | 13,8% | 10,1% | 1,3%    | 47,0%                       | 26,3% | 14,2% | 11,1% | 1,4%    | 1,0%                          | 0,5%  | -0,4% | -1,0% | -0,1%   | 102,0%                 | 102,1% | 97,1%  | 91,2% | 92,0%   |
| 02:00 | 48,0%                      | 26,8% | 13,8% | 10,1% | 1,3%    | 46,7%                       | 26,5% | 14,3% | 11,0% | 1,4%    | 1,3%                          | 0,3%  | -0,5% | -0,9% | -0,1%   | 102,7%                 | 101,1% | 96,3%  | 91,5% | 93,1%   |
| 03:00 | 48,0%                      | 26,8% | 13,8% | 10,1% | 1,3%    | 46,6%                       | 26,6% | 14,4% | 11,1% | 1,4%    | 1,4%                          | 0,3%  | -0,6% | -1,0% | -0,1%   | 103,1%                 | 101,0% | 95,9%  | 91,1% | 92,7%   |
| 04:00 | 48,0%                      | 26,8% | 13,8% | 10,1% | 1,3%    | 46,4%                       | 26,6% | 14,5% | 11,1% | 1,4%    | 1,6%                          | 0,2%  | -0,7% | -1,1% | -0,1%   | 103,5%                 | 100,8% | 95,3%  | 90,5% | 92,0%   |
| 05:00 | 48,0%                      | 26,8% | 13,8% | 10,1% | 1,3%    | 46,3%                       | 26,6% | 14,5% | 11,2% | 1,4%    | 1,7%                          | 0,2%  | -0,7% | -1,1% | -0,1%   | 103,8%                 | 100,9% | 95,0%  | 90,1% | 91,4%   |
| 06:00 | 48,0%                      | 26,8% | 13,8% | 10,1% | 1,3%    | 46,9%                       | 26,3% | 14,4% | 11,1% | 1,4%    | 1,1%                          | 0,6%  | -0,5% | -1,0% | -0,1%   | 102,4%                 | 102,2% | 96,2%  | 90,8% | 91,5%   |
| 07:00 | 48,0%                      | 26,8% | 13,8% | 10,1% | 1,3%    | 48,3%                       | 25,5% | 13,9% | 10,8% | 1,4%    | -0,3%                         | 1,3%  | -0,1% | -0,8% | -0,1%   | 99,3%                  | 105,2% | 99,2%  | 92,9% | 92,3%   |
| 08:00 | 48,0%                      | 26,8% | 13,8% | 10,1% | 1,3%    | 49,6%                       | 24,6% | 13,6% | 10,7% | 1,4%    | -1,6%                         | 2,2%  | 0,2%  | -0,7% | -0,1%   | 96,7%                  | 109,0% | 101,4% | 93,9% | 92,7%   |
| 09:00 | 48,0%                      | 26,8% | 13,8% | 10,1% | 1,3%    | 50,2%                       | 24,1% | 13,5% | 10,8% | 1,4%    | -2,2%                         | 2,7%  | 0,3%  | -0,7% | -0,1%   | 95,7%                  | 111,1% | 102,0% | 93,7% | 91,9%   |
| 10:00 | 48,0%                      | 26,8% | 13,8% | 10,1% | 1,3%    | 50,8%                       | 23,7% | 13,4% | 10,7% | 1,4%    | -2,8%                         | 3,1%  | 0,4%  | -0,7% | -0,1%   | 94,6%                  | 113,0% | 103,2% | 93,9% | 91,9%   |
| 11:00 | 48,0%                      | 26,8% | 13,8% | 10,1% | 1,3%    | 51,4%                       | 23,4% | 13,2% | 10,6% | 1,4%    | -3,4%                         | 3,4%  | 0,6%  | -0,6% | -0,1%   | 93,5%                  | 114,6% | 104,5% | 94,7% | 92,5%   |
| 12:00 | 48,0%                      | 26,8% | 13,8% | 10,1% | 1,3%    | 51,6%                       | 23,2% | 13,2% | 10,6% | 1,4%    | -3,6%                         | 3,6%  | 0,6%  | -0,5% | -0,1%   | 93,0%                  | 115,5% | 104,9% | 94,9% | 92,7%   |
| 13:00 | 48,0%                      | 26,8% | 13,8% | 10,1% | 1,3%    | 51,5%                       | 23,3% | 13,2% | 10,7% | 1,4%    | -3,5%                         | 3,6%  | 0,6%  | -0,6% | -0,1%   | 93,3%                  | 115,3% | 104,5% | 94,5% | 92,4%   |
| 14:00 | 48,0%                      | 26,8% | 13,8% | 10,1% | 1,3%    | 51,2%                       | 23,4% | 13,3% | 10,7% | 1,4%    | -3,2%                         | 3,4%  | 0,5%  | -0,6% | -0,1%   | 93,7%                  | 114,6% | 104,1% | 94,2% | 92,6%   |
| 15:00 | 48,0%                      | 26,8% | 13,8% | 10,1% | 1,3%    | 50,7%                       | 23,8% | 13,4% | 10,7% | 1,4%    | -2,7%                         | 3,0%  | 0,4%  | -0,7% | -0,1%   | 94,7%                  | 112,8% | 103,2% | 93,9% | 92,5%   |
| 16:00 | 48,0%                      | 26,8% | 13,8% | 10,1% | 1,3%    | 49,7%                       | 24,4% | 13,6% | 10,9% | 1,4%    | -1,7%                         | 2,4%  | 0,2%  | -0,8% | -0,1%   | 96,5%                  | 110,0% | 101,3% | 92,9% | 92,2%   |
| 17:00 | 48,0%                      | 26,8% | 13,8% | 10,1% | 1,3%    | 48,8%                       | 25,0% | 13,9% | 10,9% | 1,4%    | -0,8%                         | 1,9%  | -0,1% | -0,9% | -0,1%   | 98,3%                  | 107,4% | 99,6%  | 92,1% | 91,8%   |
| 18:00 | 48,0%                      | 26,8% | 13,8% | 10,1% | 1,3%    | 48,1%                       | 25,3% | 14,0% | 11,1% | 1,4%    | -0,1%                         | 1,5%  | -0,2% | -1,0% | -0,1%   | 99,7%                  | 105,8% | 98,3%  | 91,1% | 91,1%   |
| 19:00 | 48,0%                      | 26,8% | 13,8% | 10,1% | 1,3%    | 47,6%                       | 25,6% | 14,2% | 11,2% | 1,4%    | 0,4%                          | 1,2%  | -0,4% | -1,1% | -0,1%   | 100,8%                 | 104,7% | 97,4%  | 90,3% | 90,3%   |
| 20:00 | 48,0%                      | 26,8% | 13,8% | 10,1% | 1,3%    | 47,3%                       | 25,8% | 14,3% | 11,2% | 1,4%    | 0,7%                          | 1,0%  | -0,4% | -1,1% | -0,1%   | 101,5%                 | 104,0% | 96,9%  | 89,9% | 89,9%   |
| 21:00 | 48,0%                      | 26,8% | 13,8% | 10,1% | 1,3%    | 47,1%                       | 26,0% | 14,3% | 11,2% | 1,4%    | 0,9%                          | 0,9%  | -0,5% | -1,1% | -0,1%   | 101,9%                 | 103,3% | 96,5%  | 89,8% | 90,0%   |
| 22:00 | 48,0%                      | 26,8% | 13,8% | 10,1% | 1,3%    | 47,0%                       | 26,1% | 14,3% | 11,2% | 1,4%    | 1,0%                          | 0,7%  | -0,5% | -1,1% | -0,1%   | 102,2%                 | 102,8% | 96,4%  | 89,9% | 90,6%   |
| 23:00 | 48,0%                      | 26,8% | 13,8% | 10,1% | 1,3%    | 47,0%                       | 26,2% | 14,3% | 11,2% | 1,4%    | 1,0%                          | 0,7%  | -0,5% | -1,1% | -0,1%   | 102,2%                 | 102,5% | 96,6%  | 90,4% | 91,2%   |

Table A8: Descriptive statistics for June.

| Time  | Static population (shares) |       |       |       |         | Dynamic population (shares) |       |       |       |         | Difference (Static - Dynamic) |       |       |       |         | Ratio (Static/Dynamic) |        |       |       |         |
|-------|----------------------------|-------|-------|-------|---------|-----------------------------|-------|-------|-------|---------|-------------------------------|-------|-------|-------|---------|------------------------|--------|-------|-------|---------|
|       | 0-10                       | 10-20 | 20-30 | 30-60 | Over 60 | 0-10                        | 10-20 | 20-30 | 30-60 | Over 60 | 0-10                          | 10-20 | 20-30 | 30-60 | Over 60 | 0-10                   | 10-20  | 20-30 | 30-60 | Over 60 |
| 00:00 | 48,0%                      | 26,8% | 13,8% | 10,1% | 1,3%    | 44,8%                       | 26,1% | 14,9% | 12,4% | 1,7%    | 3,2%                          | 0,7%  | -1,1% | -2,3% | -0,5%   | 107,2%                 | 102,7% | 92,4% | 81,2% | 73,7%   |
| 01:00 | 48,0%                      | 26,8% | 13,8% | 10,1% | 1,3%    | 44,8%                       | 26,2% | 14,9% | 12,4% | 1,7%    | 3,2%                          | 0,7%  | -1,1% | -2,3% | -0,4%   | 107,1%                 | 102,5% | 92,5% | 81,6% | 74,2%   |
| 02:00 | 48,0%                      | 26,8% | 13,8% | 10,1% | 1,3%    | 44,4%                       | 26,4% | 15,1% | 12,4% | 1,7%    | 3,6%                          | 0,4%  | -1,3% | -2,3% | -0,4%   | 108,2%                 | 101,5% | 91,3% | 81,6% | 74,7%   |
| 03:00 | 48,0%                      | 26,8% | 13,8% | 10,1% | 1,3%    | 44,2%                       | 26,5% | 15,2% | 12,4% | 1,7%    | 3,8%                          | 0,4%  | -1,4% | -2,3% | -0,4%   | 108,6%                 | 101,3% | 91,0% | 81,2% | 74,5%   |
| 04:00 | 48,0%                      | 26,8% | 13,8% | 10,1% | 1,3%    | 44,0%                       | 26,5% | 15,3% | 12,5% | 1,7%    | 4,0%                          | 0,3%  | -1,4% | -2,4% | -0,5%   | 109,1%                 | 101,1% | 90,5% | 80,8% | 74,0%   |
| 05:00 | 48,0%                      | 26,8% | 13,8% | 10,1% | 1,3%    | 43,9%                       | 26,5% | 15,3% | 12,5% | 1,7%    | 4,1%                          | 0,3%  | -1,5% | -2,4% | -0,5%   | 109,3%                 | 101,2% | 90,2% | 80,6% | 73,8%   |
| 06:00 | 48,0%                      | 26,8% | 13,8% | 10,1% | 1,3%    | 44,6%                       | 26,2% | 15,1% | 12,4% | 1,7%    | 3,4%                          | 0,6%  | -1,3% | -2,3% | -0,5%   | 107,7%                 | 102,4% | 91,4% | 81,3% | 73,9%   |
| 07:00 | 48,0%                      | 26,8% | 13,8% | 10,1% | 1,3%    | 45,8%                       | 25,5% | 14,7% | 12,2% | 1,7%    | 2,2%                          | 1,3%  | -0,9% | -2,1% | -0,4%   | 104,7%                 | 105,1% | 93,8% | 82,7% | 74,3%   |
| 08:00 | 48,0%                      | 26,8% | 13,8% | 10,1% | 1,3%    | 46,7%                       | 24,9% | 14,5% | 12,2% | 1,7%    | 1,3%                          | 1,9%  | -0,7% | -2,1% | -0,5%   | 102,9%                 | 107,7% | 95,0% | 82,9% | 74,0%   |
| 09:00 | 48,0%                      | 26,8% | 13,8% | 10,1% | 1,3%    | 47,0%                       | 24,5% | 14,5% | 12,2% | 1,8%    | 1,0%                          | 2,3%  | -0,7% | -2,1% | -0,5%   | 102,1%                 | 109,4% | 95,5% | 82,4% | 73,0%   |
| 10:00 | 48,0%                      | 26,8% | 13,8% | 10,1% | 1,3%    | 47,5%                       | 24,2% | 14,3% | 12,2% | 1,8%    | 0,5%                          | 2,7%  | -0,5% | -2,1% | -0,5%   | 101,0%                 | 111,0% | 96,5% | 82,4% | 72,6%   |
| 11:00 | 48,0%                      | 26,8% | 13,8% | 10,1% | 1,3%    | 48,0%                       | 23,8% | 14,2% | 12,2% | 1,8%    | 0,0%                          | 3,0%  | -0,4% | -2,1% | -0,5%   | 100,0%                 | 112,5% | 97,4% | 82,6% | 72,8%   |
| 12:00 | 48,0%                      | 26,8% | 13,8% | 10,1% | 1,3%    | 48,1%                       | 23,7% | 14,2% | 12,2% | 1,8%    | -0,1%                         | 3,1%  | -0,4% | -2,1% | -0,5%   | 99,7%                  | 113,2% | 97,4% | 82,5% | 72,9%   |
| 13:00 | 48,0%                      | 26,8% | 13,8% | 10,1% | 1,3%    | 47,9%                       | 23,7% | 14,3% | 12,3% | 1,8%    | 0,1%                          | 3,1%  | -0,5% | -2,2% | -0,5%   | 100,3%                 | 112,9% | 96,7% | 81,8% | 72,6%   |
| 14:00 | 48,0%                      | 26,8% | 13,8% | 10,1% | 1,3%    | 47,6%                       | 23,9% | 14,4% | 12,4% | 1,8%    | 0,4%                          | 2,9%  | -0,6% | -2,3% | -0,5%   | 100,8%                 | 112,2% | 96,1% | 81,5% | 72,7%   |
| 15:00 | 48,0%                      | 26,8% | 13,8% | 10,1% | 1,3%    | 47,2%                       | 24,2% | 14,4% | 12,4% | 1,8%    | 0,8%                          | 2,6%  | -0,6% | -2,3% | -0,5%   | 101,7%                 | 110,8% | 95,6% | 81,4% | 73,0%   |
| 16:00 | 48,0%                      | 26,8% | 13,8% | 10,1% | 1,3%    | 46,5%                       | 24,7% | 14,6% | 12,4% | 1,8%    | 1,5%                          | 2,2%  | -0,8% | -2,4% | -0,5%   | 103,2%                 | 108,8% | 94,4% | 81,1% | 73,1%   |
| 17:00 | 48,0%                      | 26,8% | 13,8% | 10,1% | 1,3%    | 45,8%                       | 25,2% | 14,8% | 12,5% | 1,8%    | 2,2%                          | 1,6%  | -1,0% | -2,4% | -0,5%   | 104,9%                 | 106,5% | 93,3% | 80,9% | 73,1%   |
| 18:00 | 48,0%                      | 26,8% | 13,8% | 10,1% | 1,3%    | 45,3%                       | 25,5% | 14,9% | 12,5% | 1,8%    | 2,7%                          | 1,3%  | -1,1% | -2,5% | -0,5%   | 106,1%                 | 105,1% | 92,5% | 80,4% | 72,8%   |
| 19:00 | 48,0%                      | 26,8% | 13,8% | 10,1% | 1,3%    | 44,9%                       | 25,7% | 15,0% | 12,6% | 1,8%    | 3,1%                          | 1,1%  | -1,2% | -2,5% | -0,5%   | 107,0%                 | 104,2% | 92,0% | 80,0% | 72,4%   |
| 20:00 | 48,0%                      | 26,8% | 13,8% | 10,1% | 1,3%    | 44,7%                       | 25,9% | 15,0% | 12,6% | 1,8%    | 3,3%                          | 1,0%  | -1,2% | -2,5% | -0,5%   | 107,4%                 | 103,7% | 91,8% | 79,9% | 72,3%   |
| 21:00 | 48,0%                      | 26,8% | 13,8% | 10,1% | 1,3%    | 44,6%                       | 25,9% | 15,1% | 12,6% | 1,8%    | 3,4%                          | 0,9%  | -1,2% | -2,5% | -0,5%   | 107,6%                 | 103,4% | 91,7% | 79,9% | 72,2%   |
| 22:00 | 48,0%                      | 26,8% | 13,8% | 10,1% | 1,3%    | 44,6%                       | 26,0% | 15,0% | 12,6% | 1,8%    | 3,4%                          | 0,8%  | -1,2% | -2,5% | -0,5%   | 107,7%                 | 103,0% | 91,8% | 80,2% | 72,6%   |
| 23:00 | 48,0%                      | 26,8% | 13,8% | 10,1% | 1,3%    | 44,6%                       | 26,1% | 15,0% | 12,5% | 1,8%    | 3,4%                          | 0,7%  | -1,2% | -2,4% | -0,5%   | 107,5%                 | 102,7% | 92,1% | 80,7% | 73,2%   |



Table A9: Descriptive statistics for July.

| Time  | Static population (shares) |       |       |       |         | Dynamic population (shares) |       |       |       |         | Difference (Static - Dynamic) |       |       |       |         | Ratio (Static/Dynamic) |        |       |       |         |
|-------|----------------------------|-------|-------|-------|---------|-----------------------------|-------|-------|-------|---------|-------------------------------|-------|-------|-------|---------|------------------------|--------|-------|-------|---------|
|       | 0-10                       | 10-20 | 20-30 | 30-60 | Over 60 | 0-10                        | 10-20 | 20-30 | 30-60 | Over 60 | 0-10                          | 10-20 | 20-30 | 30-60 | Over 60 | 0-10                   | 10-20  | 20-30 | 30-60 | Over 60 |
| 00:00 | 48,0%                      | 26,8% | 13,8% | 10,1% | 1,3%    | 41,6%                       | 25,5% | 15,9% | 14,5% | 2,4%    | 6,4%                          | 1,3%  | -2,1% | -4,4% | -1,2%   | 115,3%                 | 105,1% | 86,7% | 69,7% | 52,6%   |
| 01:00 | 48,0%                      | 26,8% | 13,8% | 10,1% | 1,3%    | 41,7%                       | 25,6% | 15,9% | 14,4% | 2,4%    | 6,3%                          | 1,3%  | -2,1% | -4,3% | -1,1%   | 115,0%                 | 104,9% | 87,0% | 70,1% | 53,0%   |
| 02:00 | 48,0%                      | 26,8% | 13,8% | 10,1% | 1,3%    | 41,4%                       | 25,9% | 16,0% | 14,2% | 2,4%    | 6,6%                          | 0,9%  | -2,2% | -4,2% | -1,1%   | 115,8%                 | 103,5% | 86,1% | 70,8% | 54,4%   |
| 03:00 | 48,0%                      | 26,8% | 13,8% | 10,1% | 1,3%    | 41,3%                       | 25,9% | 16,1% | 14,3% | 2,4%    | 6,7%                          | 0,9%  | -2,3% | -4,2% | -1,1%   | 116,3%                 | 103,4% | 85,8% | 70,5% | 54,4%   |
| 04:00 | 48,0%                      | 26,8% | 13,8% | 10,1% | 1,3%    | 41,1%                       | 26,0% | 16,2% | 14,4% | 2,4%    | 6,9%                          | 0,8%  | -2,4% | -4,3% | -1,1%   | 116,9%                 | 103,2% | 85,4% | 70,1% | 54,1%   |
| 05:00 | 48,0%                      | 26,8% | 13,8% | 10,1% | 1,3%    | 41,0%                       | 26,0% | 16,2% | 14,4% | 2,4%    | 7,0%                          | 0,8%  | -2,4% | -4,3% | -1,1%   | 117,0%                 | 103,2% | 85,1% | 70,0% | 54,1%   |
| 06:00 | 48,0%                      | 26,8% | 13,8% | 10,1% | 1,3%    | 41,5%                       | 25,8% | 16,1% | 14,3% | 2,4%    | 6,5%                          | 1,1%  | -2,3% | -4,2% | -1,1%   | 115,6%                 | 104,1% | 85,9% | 70,6% | 54,3%   |
| 07:00 | 48,0%                      | 26,8% | 13,8% | 10,1% | 1,3%    | 42,2%                       | 25,3% | 15,9% | 14,2% | 2,4%    | 5,8%                          | 1,5%  | -2,0% | -4,1% | -1,1%   | 113,7%                 | 105,8% | 87,1% | 71,0% | 54,2%   |
| 08:00 | 48,0%                      | 26,8% | 13,8% | 10,1% | 1,3%    | 42,5%                       | 25,1% | 15,8% | 14,2% | 2,4%    | 5,5%                          | 1,8%  | -2,0% | -4,2% | -1,1%   | 113,0%                 | 107,0% | 87,4% | 70,7% | 53,6%   |
| 09:00 | 48,0%                      | 26,8% | 13,8% | 10,1% | 1,3%    | 42,7%                       | 24,8% | 15,8% | 14,3% | 2,4%    | 5,3%                          | 2,0%  | -2,0% | -4,3% | -1,2%   | 112,5%                 | 108,1% | 87,6% | 70,3% | 52,8%   |
| 10:00 | 48,0%                      | 26,8% | 13,8% | 10,1% | 1,3%    | 43,0%                       | 24,5% | 15,7% | 14,4% | 2,5%    | 5,0%                          | 2,4%  | -1,8% | -4,3% | -1,2%   | 111,7%                 | 109,6% | 88,2% | 69,9% | 52,2%   |
| 11:00 | 48,0%                      | 26,8% | 13,8% | 10,1% | 1,3%    | 43,4%                       | 24,1% | 15,6% | 14,5% | 2,5%    | 4,6%                          | 2,7%  | -1,7% | -4,4% | -1,2%   | 110,7%                 | 111,2% | 88,8% | 69,7% | 51,9%   |
| 12:00 | 48,0%                      | 26,8% | 13,8% | 10,1% | 1,3%    | 43,5%                       | 23,9% | 15,6% | 14,6% | 2,5%    | 4,5%                          | 2,9%  | -1,7% | -4,5% | -1,2%   | 110,3%                 | 112,2% | 88,8% | 69,3% | 51,7%   |
| 13:00 | 48,0%                      | 26,8% | 13,8% | 10,1% | 1,3%    | 43,4%                       | 23,8% | 15,6% | 14,7% | 2,5%    | 4,6%                          | 3,0%  | -1,8% | -4,6% | -1,2%   | 110,6%                 | 112,6% | 88,4% | 68,8% | 51,5%   |
| 14:00 | 48,0%                      | 26,8% | 13,8% | 10,1% | 1,3%    | 43,3%                       | 23,8% | 15,7% | 14,7% | 2,5%    | 4,7%                          | 3,0%  | -1,9% | -4,6% | -1,2%   | 111,0%                 | 112,5% | 88,0% | 68,5% | 51,4%   |
| 15:00 | 48,0%                      | 26,8% | 13,8% | 10,1% | 1,3%    | 43,0%                       | 24,0% | 15,7% | 14,7% | 2,5%    | 5,0%                          | 2,8%  | -1,9% | -4,6% | -1,2%   | 111,5%                 | 111,7% | 87,8% | 68,5% | 51,4%   |
| 16:00 | 48,0%                      | 26,8% | 13,8% | 10,1% | 1,3%    | 42,6%                       | 24,3% | 15,8% | 14,7% | 2,5%    | 5,4%                          | 2,5%  | -2,0% | -4,6% | -1,2%   | 112,6%                 | 110,3% | 87,2% | 68,6% | 51,4%   |
| 17:00 | 48,0%                      | 26,8% | 13,8% | 10,1% | 1,3%    | 42,1%                       | 24,7% | 16,0% | 14,7% | 2,5%    | 5,9%                          | 2,1%  | -2,2% | -4,6% | -1,2%   | 113,9%                 | 108,7% | 86,5% | 68,5% | 51,4%   |
| 18:00 | 48,0%                      | 26,8% | 13,8% | 10,1% | 1,3%    | 41,8%                       | 24,9% | 16,0% | 14,8% | 2,5%    | 6,2%                          | 1,9%  | -2,2% | -4,7% | -1,2%   | 114,9%                 | 107,7% | 86,1% | 68,3% | 51,3%   |
| 19:00 | 48,0%                      | 26,8% | 13,8% | 10,1% | 1,3%    | 41,5%                       | 25,1% | 16,1% | 14,8% | 2,5%    | 6,5%                          | 1,7%  | -2,3% | -4,7% | -1,2%   | 115,5%                 | 107,0% | 85,9% | 68,1% | 51,2%   |
| 20:00 | 48,0%                      | 26,8% | 13,8% | 10,1% | 1,3%    | 41,4%                       | 25,2% | 16,1% | 14,8% | 2,5%    | 6,6%                          | 1,6%  | -2,3% | -4,7% | -1,2%   | 115,9%                 | 106,4% | 85,8% | 68,1% | 51,2%   |
| 21:00 | 48,0%                      | 26,8% | 13,8% | 10,1% | 1,3%    | 41,3%                       | 25,3% | 16,1% | 14,8% | 2,5%    | 6,7%                          | 1,5%  | -2,3% | -4,7% | -1,2%   | 116,2%                 | 106,0% | 85,8% | 68,3% | 51,3%   |
| 22:00 | 48,0%                      | 26,8% | 13,8% | 10,1% | 1,3%    | 41,3%                       | 25,4% | 16,1% | 14,7% | 2,5%    | 6,7%                          | 1,4%  | -2,3% | -4,6% | -1,2%   | 116,3%                 | 105,5% | 85,9% | 68,4% | 51,5%   |
| 23:00 | 48,0%                      | 26,8% | 13,8% | 10,1% | 1,3%    | 41,4%                       | 25,5% | 16,0% | 14,6% | 2,5%    | 6,6%                          | 1,3%  | -2,2% | -4,5% | -1,2%   | 115,9%                 | 105,3% | 86,2% | 69,0% | 52,0%   |

Table A10: Descriptive statistics for August.

| Time  | Static population (shares) |       |       |       |         | Dynamic population (shares) |       |       |       |         | Difference (Static - Dynamic) |       |       |       |         | Ratio (Static/Dynamic) |        |       |       |         |
|-------|----------------------------|-------|-------|-------|---------|-----------------------------|-------|-------|-------|---------|-------------------------------|-------|-------|-------|---------|------------------------|--------|-------|-------|---------|
|       | 0-10                       | 10-20 | 20-30 | 30-60 | Over 60 | 0-10                        | 10-20 | 20-30 | 30-60 | Over 60 | 0-10                          | 10-20 | 20-30 | 30-60 | Over 60 | 0-10                   | 10-20  | 20-30 | 30-60 | Over 60 |
| 00:00 | 48,0%                      | 26,8% | 13,8% | 10,1% | 1,3%    | 45,2%                       | 25,9% | 14,8% | 12,3% | 1,8%    | 2,8%                          | 0,9%  | -1,0% | -2,2% | -0,5%   | 106,2%                 | 103,4% | 93,4% | 82,3% | 70,2%   |
| 01:00 | 48,0%                      | 26,8% | 13,8% | 10,1% | 1,3%    | 45,3%                       | 26,0% | 14,7% | 12,2% | 1,8%    | 2,7%                          | 0,8%  | -0,9% | -2,1% | -0,5%   | 106,0%                 | 103,1% | 93,7% | 82,9% | 70,8%   |
| 02:00 | 48,0%                      | 26,8% | 13,8% | 10,1% | 1,3%    | 44,7%                       | 26,3% | 14,9% | 12,2% | 1,8%    | 3,3%                          | 0,5%  | -1,1% | -2,1% | -0,5%   | 107,3%                 | 102,0% | 92,6% | 82,5% | 70,4%   |
| 03:00 | 48,0%                      | 26,8% | 13,8% | 10,1% | 1,3%    | 44,6%                       | 26,3% | 15,0% | 12,3% | 1,8%    | 3,4%                          | 0,5%  | -1,2% | -2,2% | -0,6%   | 107,7%                 | 101,9% | 92,1% | 81,9% | 70,1%   |
| 04:00 | 48,0%                      | 26,8% | 13,8% | 10,1% | 1,3%    | 44,3%                       | 26,4% | 15,1% | 12,4% | 1,9%    | 3,7%                          | 0,5%  | -1,3% | -2,3% | -0,6%   | 108,3%                 | 101,8% | 91,6% | 81,4% | 69,4%   |
| 05:00 | 48,0%                      | 26,8% | 13,8% | 10,1% | 1,3%    | 44,2%                       | 26,3% | 15,1% | 12,4% | 1,9%    | 3,8%                          | 0,5%  | -1,3% | -2,4% | -0,6%   | 108,6%                 | 101,8% | 91,2% | 81,0% | 68,9%   |
| 06:00 | 48,0%                      | 26,8% | 13,8% | 10,1% | 1,3%    | 44,8%                       | 26,0% | 15,0% | 12,3% | 1,9%    | 3,2%                          | 0,8%  | -1,2% | -2,2% | -0,6%   | 107,2%                 | 103,0% | 92,2% | 81,8% | 69,0%   |
| 07:00 | 48,0%                      | 26,8% | 13,8% | 10,1% | 1,3%    | 46,0%                       | 25,4% | 14,6% | 12,1% | 1,9%    | 2,0%                          | 1,4%  | -0,8% | -2,0% | -0,6%   | 104,3%                 | 105,6% | 94,5% | 83,2% | 69,4%   |
| 08:00 | 48,0%                      | 26,8% | 13,8% | 10,1% | 1,3%    | 46,9%                       | 24,7% | 14,4% | 12,1% | 1,9%    | 1,1%                          | 2,1%  | -0,6% | -2,0% | -0,6%   | 102,3%                 | 108,5% | 95,8% | 83,4% | 68,9%   |
| 09:00 | 48,0%                      | 26,8% | 13,8% | 10,1% | 1,3%    | 47,2%                       | 24,3% | 14,4% | 12,2% | 1,9%    | 0,8%                          | 2,5%  | -0,6% | -2,1% | -0,6%   | 101,6%                 | 110,2% | 96,2% | 82,8% | 67,9%   |
| 10:00 | 48,0%                      | 26,8% | 13,8% | 10,1% | 1,3%    | 47,7%                       | 24,0% | 14,2% | 12,2% | 1,9%    | 0,3%                          | 2,9%  | -0,4% | -2,1% | -0,6%   | 100,6%                 | 111,9% | 97,1% | 82,7% | 67,6%   |
| 11:00 | 48,0%                      | 26,8% | 13,8% | 10,1% | 1,3%    | 48,3%                       | 23,6% | 14,1% | 12,1% | 1,9%    | -0,3%                         | 3,2%  | -0,3% | -2,1% | -0,6%   | 99,4%                  | 113,5% | 98,1% | 83,0% | 67,9%   |
| 12:00 | 48,0%                      | 26,8% | 13,8% | 10,1% | 1,3%    | 48,5%                       | 23,4% | 14,0% | 12,1% | 1,9%    | -0,5%                         | 3,4%  | -0,2% | -2,0% | -0,6%   | 98,9%                  | 114,5% | 98,4% | 83,1% | 68,0%   |
| 13:00 | 48,0%                      | 26,8% | 13,8% | 10,1% | 1,3%    | 48,4%                       | 23,4% | 14,1% | 12,2% | 1,9%    | -0,4%                         | 3,4%  | -0,3% | -2,1% | -0,6%   | 99,1%                  | 114,6% | 98,0% | 82,7% | 67,8%   |
| 14:00 | 48,0%                      | 26,8% | 13,8% | 10,1% | 1,3%    | 48,3%                       | 23,5% | 14,1% | 12,2% | 1,9%    | -0,3%                         | 3,3%  | -0,3% | -2,1% | -0,6%   | 99,4%                  | 114,2% | 97,7% | 82,6% | 68,0%   |
| 15:00 | 48,0%                      | 26,8% | 13,8% | 10,1% | 1,3%    | 47,9%                       | 23,8% | 14,2% | 12,2% | 1,9%    | 0,1%                          | 3,0%  | -0,4% | -2,1% | -0,6%   | 100,2%                 | 112,7% | 97,1% | 82,5% | 68,3%   |
| 16:00 | 48,0%                      | 26,8% | 13,8% | 10,1% | 1,3%    | 47,1%                       | 24,3% | 14,4% | 12,3% | 1,9%    | 0,9%                          | 2,5%  | -0,6% | -2,2% | -0,6%   | 102,0%                 | 110,2% | 95,7% | 82,1% | 68,5%   |
| 17:00 | 48,0%                      | 26,8% | 13,8% | 10,1% | 1,3%    | 46,2%                       | 24,9% | 14,7% | 12,3% | 1,9%    | 1,8%                          | 1,9%  | -0,8% | -2,3% | -0,6%   | 103,9%                 | 107,7% | 94,2% | 81,7% | 68,4%   |
| 18:00 | 48,0%                      | 26,8% | 13,8% | 10,1% | 1,3%    | 45,6%                       | 25,2% | 14,8% | 12,4% | 1,9%    | 2,4%                          | 1,6%  | -1,0% | -2,4% | -0,6%   | 105,2%                 | 106,3% | 93,3% | 81,1% | 68,1%   |
| 19:00 | 48,0%                      | 26,8% | 13,8% | 10,1% | 1,3%    | 45,3%                       | 25,4% | 14,9% | 12,5% | 1,9%    | 2,7%                          | 1,4%  | -1,1% | -2,4% | -0,6%   | 106,0%                 | 105,4% | 92,9% | 80,7% | 67,8%   |
| 20:00 | 48,0%                      | 26,8% | 13,8% | 10,1% | 1,3%    | 45,3%                       | 25,4% | 14,9% | 12,5% | 1,9%    | 2,7%                          | 1,4%  | -1,1% | -2,4% | -0,6%   | 106,0%                 | 105,4% | 92,9% | 80,7% | 67,8%   |
| 21:00 | 48,0%                      | 26,8% | 13,8% | 10,1% | 1,3%    | 45,0%                       | 25,7% | 14,9% | 12,5% | 1,9%    | 3,0%                          | 1,1%  | -1,1% | -2,4% | -0,6%   | 106,7%                 | 104,4% | 92,6% | 80,6% | 67,8%   |
| 22:00 | 48,0%                      | 26,8% | 13,8% | 10,1% | 1,3%    | 44,9%                       | 25,8% | 14,9% | 12,5% | 1,9%    | 3,1%                          | 1,0%  | -1,1% | -2,4% | -0,6%   | 106,9%                 | 103,8% | 92,6% | 80,9% | 68,3%   |
| 23:00 | 48,0%                      | 26,8% | 13,8% | 10,1% | 1,3%    | 45,0%                       | 25,9% | 14,9% | 12,4% | 1,9%    | 3,0%                          | 0,9%  | -1,0% | -2,3% | -0,6%   | 106,6%                 | 103,5% | 93,0% | 81,5% | 69,1%   |

Table A11: Descriptive statistics for September.

| Time  | Static population (shares) |       |       |       |         | Dynamic population (shares) |       |       |       |         | Difference (Static - Dynamic) |       |       |       |         | Ratio (Static/Dynamic) |        |        |       |         |
|-------|----------------------------|-------|-------|-------|---------|-----------------------------|-------|-------|-------|---------|-------------------------------|-------|-------|-------|---------|------------------------|--------|--------|-------|---------|
|       | 0-10                       | 10-20 | 20-30 | 30-60 | Over 60 | 0-10                        | 10-20 | 20-30 | 30-60 | Over 60 | 0-10                          | 10-20 | 20-30 | 30-60 | Over 60 | 0-10                   | 10-20  | 20-30  | 30-60 | Over 60 |
| 00:00 | 48,0%                      | 26,8% | 13,8% | 10,1% | 1,3%    | 47,8%                       | 26,0% | 13,9% | 10,8% | 1,6%    | 0,2%                          | 0,9%  | -0,1% | -0,8% | -0,3%   | 100,4%                 | 103,3% | 99,6%  | 93,1% | 82,8%   |
| 01:00 | 48,0%                      | 26,8% | 13,8% | 10,1% | 1,3%    | 47,9%                       | 26,0% | 13,8% | 10,8% | 1,5%    | 0,1%                          | 0,8%  | 0,0%  | -0,7% | -0,3%   | 100,2%                 | 103,2% | 100,0% | 93,8% | 83,6%   |
| 02:00 | 48,0%                      | 26,8% | 13,8% | 10,1% | 1,3%    | 47,4%                       | 26,2% | 14,0% | 10,9% | 1,6%    | 0,6%                          | 0,6%  | -0,2% | -0,8% | -0,3%   | 101,4%                 | 102,3% | 98,6%  | 92,9% | 82,0%   |
| 03:00 | 48,0%                      | 26,8% | 13,8% | 10,1% | 1,3%    | 47,2%                       | 26,3% | 14,1% | 10,9% | 1,6%    | 0,8%                          | 0,6%  | -0,3% | -0,9% | -0,3%   | 101,8%                 | 102,2% | 98,1%  | 92,2% | 81,4%   |
| 04:00 | 48,0%                      | 26,8% | 13,8% | 10,1% | 1,3%    | 46,9%                       | 26,3% | 14,2% | 11,0% | 1,6%    | 1,1%                          | 0,5%  | -0,4% | -0,9% | -0,3%   | 102,3%                 | 102,0% | 97,5%  | 91,5% | 80,5%   |
| 05:00 | 48,0%                      | 26,8% | 13,8% | 10,1% | 1,3%    | 46,7%                       | 26,3% | 14,2% | 11,1% | 1,6%    | 1,3%                          | 0,5%  | -0,4% | -1,0% | -0,3%   | 102,7%                 | 102,0% | 97,0%  | 90,8% | 79,1%   |
| 06:00 | 48,0%                      | 26,8% | 13,8% | 10,1% | 1,3%    | 47,3%                       | 26,0% | 14,1% | 11,0% | 1,6%    | 0,7%                          | 0,9%  | -0,3% | -0,9% | -0,4%   | 101,5%                 | 103,3% | 98,1%  | 91,4% | 78,4%   |
| 07:00 | 48,0%                      | 26,8% | 13,8% | 10,1% | 1,3%    | 48,9%                       | 25,1% | 13,6% | 10,7% | 1,6%    | -0,9%                         | 1,7%  | 0,2%  | -0,7% | -0,3%   | 98,1%                  | 106,8% | 101,6% | 93,8% | 79,1%   |
| 08:00 | 48,0%                      | 26,8% | 13,8% | 10,1% | 1,3%    | 50,4%                       | 24,1% | 13,3% | 10,6% | 1,6%    | -2,4%                         | 2,7%  | 0,5%  | -0,6% | -0,3%   | 95,3%                  | 111,4% | 103,9% | 94,8% | 78,9%   |
| 09:00 | 48,0%                      | 26,8% | 13,8% | 10,1% | 1,3%    | 50,9%                       | 23,6% | 13,2% | 10,7% | 1,7%    | -2,9%                         | 3,2%  | 0,6%  | -0,6% | -0,4%   | 94,3%                  | 113,8% | 104,6% | 94,3% | 77,8%   |
| 10:00 | 48,0%                      | 26,8% | 13,8% | 10,1% | 1,3%    | 51,4%                       | 23,2% | 13,1% | 10,7% | 1,7%    | -3,4%                         | 3,6%  | 0,8%  | -0,6% | -0,4%   | 93,4%                  | 115,7% | 105,8% | 94,3% | 77,3%   |
| 11:00 | 48,0%                      | 26,8% | 13,8% | 10,1% | 1,3%    | 52,0%                       | 22,8% | 12,9% | 10,6% | 1,7%    | -4,0%                         | 4,0%  | 0,9%  | -0,5% | -0,4%   | 92,3%                  | 117,4% | 107,1% | 95,0% | 78,0%   |
| 12:00 | 48,0%                      | 26,8% | 13,8% | 10,1% | 1,3%    | 52,3%                       | 22,7% | 12,8% | 10,6% | 1,6%    | -4,3%                         | 4,2%  | 1,0%  | -0,5% | -0,4%   | 91,8%                  | 118,4% | 107,6% | 95,3% | 78,5%   |
| 13:00 | 48,0%                      | 26,8% | 13,8% | 10,1% | 1,3%    | 52,1%                       | 22,7% | 12,9% | 10,6% | 1,6%    | -4,1%                         | 4,1%  | 0,9%  | -0,5% | -0,4%   | 92,1%                  | 118,1% | 107,1% | 95,0% | 78,5%   |
| 14:00 | 48,0%                      | 26,8% | 13,8% | 10,1% | 1,3%    | 52,0%                       | 22,9% | 12,9% | 10,6% | 1,6%    | -4,0%                         | 3,9%  | 0,9%  | -0,5% | -0,3%   | 92,4%                  | 117,2% | 106,9% | 95,1% | 79,2%   |
| 15:00 | 48,0%                      | 26,8% | 13,8% | 10,1% | 1,3%    | 51,5%                       | 23,3% | 13,0% | 10,6% | 1,6%    | -3,5%                         | 3,5%  | 0,8%  | -0,5% | -0,3%   | 93,2%                  | 115,1% | 106,1% | 95,1% | 80,0%   |
| 16:00 | 48,0%                      | 26,8% | 13,8% | 10,1% | 1,3%    | 50,4%                       | 24,0% | 13,3% | 10,7% | 1,6%    | -2,4%                         | 2,8%  | 0,5%  | -0,6% | -0,3%   | 95,2%                  | 111,8% | 103,7% | 94,2% | 80,4%   |
| 17:00 | 48,0%                      | 26,8% | 13,8% | 10,1% | 1,3%    | 49,4%                       | 24,7% | 13,5% | 10,8% | 1,6%    | -1,4%                         | 2,1%  | 0,3%  | -0,7% | -0,3%   | 97,2%                  | 108,7% | 102,0% | 93,5% | 80,6%   |
| 18:00 | 48,0%                      | 26,8% | 13,8% | 10,1% | 1,3%    | 48,7%                       | 25,1% | 13,7% | 10,9% | 1,6%    | -0,7%                         | 1,7%  | 0,1%  | -0,8% | -0,3%   | 98,6%                  | 106,8% | 100,5% | 92,5% | 80,3%   |
| 19:00 | 48,0%                      | 26,8% | 13,8% | 10,1% | 1,3%    | 48,2%                       | 25,4% | 13,9% | 11,0% | 1,6%    | -0,2%                         | 1,4%  | 0,0%  | -0,9% | -0,3%   | 99,7%                  | 105,7% | 99,7%  | 91,8% | 80,1%   |
| 20:00 | 48,0%                      | 26,8% | 13,8% | 10,1% | 1,3%    | 47,9%                       | 25,6% | 13,9% | 11,0% | 1,6%    | 0,1%                          | 1,2%  | -0,1% | -0,9% | -0,3%   | 100,3%                 | 104,9% | 99,2%  | 91,5% | 80,0%   |
| 21:00 | 48,0%                      | 26,8% | 13,8% | 10,1% | 1,3%    | 47,7%                       | 25,7% | 14,0% | 11,0% | 1,6%    | 0,3%                          | 1,1%  | -0,2% | -1,0% | -0,3%   | 100,7%                 | 104,2% | 98,9%  | 91,3% | 80,3%   |
| 22:00 | 48,0%                      | 26,8% | 13,8% | 10,1% | 1,3%    | 47,6%                       | 25,9% | 14,0% | 11,0% | 1,6%    | 0,5%                          | 0,9%  | -0,2% | -0,9% | -0,3%   | 101,0%                 | 103,6% | 98,8%  | 91,6% | 80,9%   |
| 23:00 | 48,0%                      | 26,8% | 13,8% | 10,1% | 1,3%    | 47,6%                       | 25,9% | 13,9% | 10,9% | 1,6%    | 0,4%                          | 0,9%  | -0,1% | -0,8% | -0,3%   | 100,8%                 | 103,4% | 99,1%  | 92,3% | 81,8%   |

Table A12: Descriptive statistics for October.

| Time  | Static population (shares) |       |       |       |         | Dynamic population (shares) |       |       |       |         | Difference (Static - Dynamic) |       |       |       |         | Ratio (Static/Dynamic) |        |        |        |         |
|-------|----------------------------|-------|-------|-------|---------|-----------------------------|-------|-------|-------|---------|-------------------------------|-------|-------|-------|---------|------------------------|--------|--------|--------|---------|
|       | 0-10                       | 10-20 | 20-30 | 30-60 | Over 60 | 0-10                        | 10-20 | 20-30 | 30-60 | Over 60 | 0-10                          | 10-20 | 20-30 | 30-60 | Over 60 | 0-10                   | 10-20  | 20-30  | 30-60  | Over 60 |
| 00:00 | 48,0%                      | 26,8% | 13,8% | 10,1% | 1,3%    | 48,7%                       | 25,9% | 13,6% | 10,3% | 1,4%    | -0,7%                         | 0,9%  | 0,2%  | -0,3% | -0,1%   | 98,6%                  | 103,4% | 101,5% | 97,5%  | 91,2%   |
| 01:00 | 48,0%                      | 26,8% | 13,8% | 10,1% | 1,3%    | 48,8%                       | 26,0% | 13,6% | 10,3% | 1,4%    | -0,8%                         | 0,8%  | 0,2%  | -0,2% | -0,1%   | 98,4%                  | 103,2% | 101,8% | 98,1%  | 92,5%   |
| 02:00 | 48,0%                      | 26,8% | 13,8% | 10,1% | 1,3%    | 48,5%                       | 26,2% | 13,7% | 10,3% | 1,4%    | -0,5%                         | 0,6%  | 0,2%  | -0,2% | -0,1%   | 99,0%                  | 102,4% | 101,1% | 98,3%  | 92,8%   |
| 03:00 | 48,0%                      | 26,8% | 13,8% | 10,1% | 1,3%    | 48,3%                       | 26,3% | 13,7% | 10,3% | 1,4%    | -0,3%                         | 0,5%  | 0,1%  | -0,2% | -0,1%   | 99,4%                  | 102,0% | 100,5% | 97,8%  | 92,8%   |
| 04:00 | 48,0%                      | 26,8% | 13,8% | 10,1% | 1,3%    | 48,0%                       | 26,3% | 13,8% | 10,4% | 1,4%    | 0,0%                          | 0,5%  | 0,0%  | -0,3% | -0,1%   | 99,9%                  | 101,8% | 99,9%  | 97,0%  | 92,1%   |
| 05:00 | 48,0%                      | 26,8% | 13,8% | 10,1% | 1,3%    | 47,9%                       | 26,3% | 13,9% | 10,5% | 1,4%    | 0,1%                          | 0,5%  | -0,1% | -0,4% | -0,1%   | 100,2%                 | 101,8% | 99,3%  | 96,3%  | 91,2%   |
| 06:00 | 48,0%                      | 26,8% | 13,8% | 10,1% | 1,3%    | 48,4%                       | 26,0% | 13,8% | 10,4% | 1,4%    | -0,4%                         | 0,8%  | 0,1%  | -0,3% | -0,1%   | 99,2%                  | 103,2% | 100,4% | 96,7%  | 90,3%   |
| 07:00 | 48,0%                      | 26,8% | 13,8% | 10,1% | 1,3%    | 49,9%                       | 25,2% | 13,3% | 10,2% | 1,4%    | -1,9%                         | 1,7%  | 0,5%  | -0,1% | -0,1%   | 96,2%                  | 106,6% | 103,6% | 98,9%  | 90,4%   |
| 08:00 | 48,0%                      | 26,8% | 13,8% | 10,1% | 1,3%    | 51,3%                       | 24,2% | 13,0% | 10,1% | 1,4%    | -3,3%                         | 2,6%  | 0,8%  | 0,0%  | -0,1%   | 93,6%                  | 110,9% | 105,9% | 99,9%  | 90,5%   |
| 09:00 | 48,0%                      | 26,8% | 13,8% | 10,1% | 1,3%    | 51,8%                       | 23,7% | 13,0% | 10,1% | 1,4%    | -3,8%                         | 3,2%  | 0,8%  | 0,0%  | -0,2%   | 92,7%                  | 113,3% | 106,5% | 99,6%  | 89,4%   |
| 10:00 | 48,0%                      | 26,8% | 13,8% | 10,1% | 1,3%    | 52,4%                       | 23,2% | 12,8% | 10,1% | 1,5%    | -4,4%                         | 3,6%  | 1,0%  | 0,0%  | -0,2%   | 91,6%                  | 115,4% | 107,8% | 99,7%  | 88,7%   |
| 11:00 | 48,0%                      | 26,8% | 13,8% | 10,1% | 1,3%    | 53,0%                       | 22,9% | 12,6% | 10,0% | 1,4%    | -5,0%                         | 4,0%  | 1,2%  | 0,1%  | -0,2%   | 90,5%                  | 117,3% | 109,4% | 100,5% | 89,0%   |
| 12:00 | 48,0%                      | 26,8% | 13,8% | 10,1% | 1,3%    | 53,4%                       | 22,6% | 12,5% | 10,0% | 1,4%    | -5,4%                         | 4,2%  | 1,3%  | 0,1%  | -0,2%   | 89,9%                  | 118,5% | 110,2% | 101,1% | 89,5%   |
| 13:00 | 48,0%                      | 26,8% | 13,8% | 10,1% | 1,3%    | 53,3%                       | 22,6% | 12,6% | 10,0% | 1,4%    | -5,3%                         | 4,2%  | 1,2%  | 0,1%  | -0,2%   | 90,0%                  | 118,5% | 109,8% | 100,7% | 89,4%   |
| 14:00 | 48,0%                      | 26,8% | 13,8% | 10,1% | 1,3%    | 53,2%                       | 22,8% | 12,6% | 10,0% | 1,4%    | -5,2%                         | 4,0%  | 1,2%  | 0,1%  | -0,1%   | 90,3%                  | 117,8% | 109,6% | 100,7% | 90,0%   |
| 15:00 | 48,0%                      | 26,8% | 13,8% | 10,1% | 1,3%    | 52,6%                       | 23,2% | 12,7% | 10,0% | 1,4%    | -4,6%                         | 3,6%  | 1,1%  | 0,0%  | -0,1%   | 91,2%                  | 115,7% | 108,6% | 100,5% | 90,6%   |
| 16:00 | 48,0%                      | 26,8% | 13,8% | 10,1% | 1,3%    | 51,6%                       | 23,9% | 13,0% | 10,2% | 1,4%    | -3,6%                         | 3,0%  | 0,8%  | -0,1% | -0,1%   | 93,1%                  | 112,4% | 106,2% | 99,2%  | 90,6%   |
| 17:00 | 48,0%                      | 26,8% | 13,8% | 10,1% | 1,3%    | 51,6%                       | 23,9% | 13,0% | 10,2% | 1,4%    | -3,6%                         | 3,0%  | 0,8%  | -0,1% | -0,1%   | 93,1%                  | 112,4% | 106,2% | 99,2%  | 90,6%   |
| 18:00 | 48,0%                      | 26,8% | 13,8% | 10,1% | 1,3%    | 49,8%                       | 24,9% | 13,5% | 10,4% | 1,4%    | -1,8%                         | 1,9%  | 0,4%  | -0,3% | -0,1%   | 96,4%                  | 107,5% | 102,6% | 97,2%  | 90,1%   |
| 19:00 | 48,0%                      | 26,8% | 13,8% | 10,1% | 1,3%    | 49,3%                       | 25,3% | 13,6% | 10,5% | 1,4%    | -1,2%                         | 1,6%  | 0,2%  | -0,4% | -0,2%   | 97,5%                  | 106,2% | 101,6% | 96,3%  | 89,3%   |
| 20:00 | 48,0%                      | 26,8% | 13,8% | 10,1% | 1,3%    | 48,9%                       | 25,5% | 13,7% | 10,5% | 1,4%    | -0,9%                         | 1,4%  | 0,1%  | -0,4% | -0,2%   | 98,2%                  | 105,3% | 101,0% | 95,9%  | 89,0%   |
| 21:00 | 48,0%                      | 26,8% | 13,8% | 10,1% | 1,3%    | 48,6%                       | 25,7% | 13,7% | 10,5% | 1,4%    | -0,6%                         | 1,1%  | 0,1%  | -0,5% | -0,2%   | 98,7%                  | 104,4% | 100,6% | 95,7%  | 89,1%   |
| 22:00 | 48,0%                      | 26,8% | 13,8% | 10,1% | 1,3%    | 48,5%                       | 25,8% | 13,7% | 10,5% | 1,4%    | -0,5%                         | 1,0%  | 0,1%  | -0,4% | -0,1%   | 99,0%                  | 103,8% | 100,6% | 96,0%  | 89,8%   |
| 23:00 | 48,0%                      | 26,8% | 13,8% | 10,1% | 1,3%    | 48,6%                       | 25,9% | 13,7% | 10,4% | 1,4%    | -0,6%                         | 0,9%  | 0,1%  | -0,3% | -0,1%   | 98,8%                  | 103,4% | 101,0% | 96,8%  | 90,6%   |

Table A13: Descriptive statistics for November.

| Time  | Static population (shares) |       |       |       |         | Dynamic population (shares) |       |       |       |         | Difference (Static - Dynamic) |       |       |       |         | Ratio (Static/Dynamic) |        |        |        |         |
|-------|----------------------------|-------|-------|-------|---------|-----------------------------|-------|-------|-------|---------|-------------------------------|-------|-------|-------|---------|------------------------|--------|--------|--------|---------|
|       | 0-10                       | 10-20 | 20-30 | 30-60 | Over 60 | 0-10                        | 10-20 | 20-30 | 30-60 | Over 60 | 0-10                          | 10-20 | 20-30 | 30-60 | Over 60 | 0-10                   | 10-20  | 20-30  | 30-60  | Over 60 |
| 00:00 | 48,0%                      | 26,8% | 13,8% | 10,1% | 1,3%    | 49,4%                       | 26,0% | 13,4% | 9,9%  | 1,3%    | -1,4%                         | 0,8%  | 0,5%  | 0,2%  | 0,0%    | 97,2%                  | 103,0% | 103,4% | 101,8% | 96,5%   |
| 01:00 | 48,0%                      | 26,8% | 13,8% | 10,1% | 1,3%    | 49,2%                       | 26,3% | 13,4% | 9,8%  | 1,3%    | -1,2%                         | 0,6%  | 0,4%  | 0,3%  | 0,0%    | 97,6%                  | 102,1% | 102,9% | 102,8% | 97,7%   |
| 02:00 | 48,0%                      | 26,8% | 13,8% | 10,1% | 1,3%    | 49,0%                       | 26,3% | 13,5% | 9,9%  | 1,3%    | -1,0%                         | 0,5%  | 0,3%  | 0,2%  | 0,0%    | 97,9%                  | 102,0% | 102,5% | 102,0% | 97,4%   |
| 03:00 | 48,0%                      | 26,8% | 13,8% | 10,1% | 1,3%    | 48,8%                       | 26,4% | 13,6% | 10,0% | 1,3%    | -0,8%                         | 0,4%  | 0,2%  | 0,1%  | 0,0%    | 98,4%                  | 101,7% | 101,8% | 101,1% | 96,9%   |
| 04:00 | 48,0%                      | 26,8% | 13,8% | 10,1% | 1,3%    | 48,6%                       | 26,4% | 13,6% | 10,0% | 1,3%    | -0,6%                         | 0,4%  | 0,2%  | 0,0%  | 0,0%    | 98,9%                  | 101,5% | 101,3% | 100,4% | 96,3%   |
| 05:00 | 48,0%                      | 26,8% | 13,8% | 10,1% | 1,3%    | 48,5%                       | 26,4% | 13,7% | 10,1% | 1,3%    | -0,5%                         | 0,4%  | 0,1%  | 0,0%  | -0,1%   | 99,0%                  | 101,5% | 100,9% | 100,0% | 95,7%   |
| 06:00 | 48,0%                      | 26,8% | 13,8% | 10,1% | 1,3%    | 49,0%                       | 26,1% | 13,5% | 10,0% | 1,4%    | -1,0%                         | 0,7%  | 0,3%  | 0,1%  | -0,1%   | 98,0%                  | 102,8% | 101,9% | 100,6% | 95,3%   |
| 07:00 | 48,0%                      | 26,8% | 13,8% | 10,1% | 1,3%    | 50,5%                       | 25,2% | 13,1% | 9,8%  | 1,3%    | -2,5%                         | 1,6%  | 0,7%  | 0,3%  | -0,1%   | 95,0%                  | 106,3% | 105,3% | 102,8% | 95,9%   |
| 08:00 | 48,0%                      | 26,8% | 13,8% | 10,1% | 1,3%    | 52,0%                       | 24,2% | 12,8% | 9,7%  | 1,3%    | -4,0%                         | 2,6%  | 1,0%  | 0,4%  | 0,0%    | 92,3%                  | 110,9% | 107,9% | 104,1% | 96,3%   |
| 09:00 | 48,0%                      | 26,8% | 13,8% | 10,1% | 1,3%    | 52,6%                       | 23,6% | 12,7% | 9,7%  | 1,4%    | -4,6%                         | 3,2%  | 1,1%  | 0,4%  | -0,1%   | 91,2%                  | 113,5% | 108,9% | 104,0% | 95,3%   |
| 10:00 | 48,0%                      | 26,8% | 13,8% | 10,1% | 1,3%    | 53,3%                       | 23,2% | 12,5% | 9,7%  | 1,4%    | -5,3%                         | 3,6%  | 1,3%  | 0,4%  | -0,1%   | 90,1%                  | 115,7% | 110,4% | 104,4% | 94,9%   |
| 11:00 | 48,0%                      | 26,8% | 13,8% | 10,1% | 1,3%    | 54,0%                       | 22,8% | 12,3% | 9,6%  | 1,3%    | -6,0%                         | 4,0%  | 1,5%  | 0,5%  | -0,1%   | 88,9%                  | 117,6% | 112,1% | 105,5% | 95,4%   |
| 12:00 | 48,0%                      | 26,8% | 13,8% | 10,1% | 1,3%    | 54,4%                       | 22,6% | 12,2% | 9,5%  | 1,3%    | -6,4%                         | 4,3%  | 1,6%  | 0,6%  | -0,1%   | 88,3%                  | 118,9% | 113,0% | 106,0% | 96,2%   |
| 13:00 | 48,0%                      | 26,8% | 13,8% | 10,1% | 1,3%    | 54,3%                       | 22,6% | 12,3% | 9,6%  | 1,3%    | -6,3%                         | 4,2%  | 1,5%  | 0,5%  | -0,1%   | 88,5%                  | 118,7% | 112,6% | 105,5% | 96,0%   |
| 14:00 | 48,0%                      | 26,8% | 13,8% | 10,1% | 1,3%    | 54,0%                       | 22,7% | 12,3% | 9,6%  | 1,3%    | -6,0%                         | 4,1%  | 1,5%  | 0,5%  | 0,0%    | 88,8%                  | 117,9% | 112,2% | 105,4% | 96,6%   |
| 15:00 | 48,0%                      | 26,8% | 13,8% | 10,1% | 1,3%    | 53,4%                       | 23,2% | 12,4% | 9,6%  | 1,3%    | -5,4%                         | 3,6%  | 1,4%  | 0,5%  | 0,0%    | 89,8%                  | 115,7% | 110,9% | 105,0% | 97,2%   |
| 16:00 | 48,0%                      | 26,8% | 13,8% | 10,1% | 1,3%    | 52,3%                       | 23,9% | 12,8% | 9,7%  | 1,3%    | -4,3%                         | 3,0%  | 1,0%  | 0,3%  | 0,0%    | 91,8%                  | 112,4% | 108,2% | 103,5% | 97,0%   |
| 17:00 | 48,0%                      | 26,8% | 13,8% | 10,1% | 1,3%    | 51,3%                       | 24,5% | 13,0% | 9,9%  | 1,3%    | -3,3%                         | 2,3%  | 0,8%  | 0,2%  | 0,0%    | 93,6%                  | 109,3% | 106,2% | 102,3% | 97,0%   |
| 18:00 | 48,0%                      | 26,8% | 13,8% | 10,1% | 1,3%    | 50,5%                       | 25,0% | 13,2% | 10,0% | 1,3%    | -2,5%                         | 1,8%  | 0,6%  | 0,1%  | -0,1%   | 95,1%                  | 107,4% | 104,4% | 100,9% | 96,3%   |
| 19:00 | 48,0%                      | 26,8% | 13,8% | 10,1% | 1,3%    | 49,9%                       | 25,3% | 13,4% | 10,1% | 1,4%    | -1,9%                         | 1,5%  | 0,4%  | 0,0%  | -0,1%   | 96,2%                  | 106,0% | 103,3% | 99,8%  | 95,3%   |
| 20:00 | 48,0%                      | 26,8% | 13,8% | 10,1% | 1,3%    | 49,5%                       | 25,5% | 13,5% | 10,1% | 1,4%    | -1,5%                         | 1,3%  | 0,4%  | -0,1% | -0,1%   | 97,0%                  | 105,0% | 102,6% | 99,4%  | 94,7%   |
| 21:00 | 48,0%                      | 26,8% | 13,8% | 10,1% | 1,3%    | 49,2%                       | 25,7% | 13,5% | 10,2% | 1,4%    | -1,2%                         | 1,1%  | 0,3%  | -0,1% | -0,1%   | 97,5%                  | 104,2% | 102,3% | 99,3%  | 94,7%   |
| 22:00 | 48,0%                      | 26,8% | 13,8% | 10,1% | 1,3%    | 49,2%                       | 25,9% | 13,5% | 10,1% | 1,3%    | -1,2%                         | 0,9%  | 0,3%  | 0,0%  | -0,1%   | 97,6%                  | 103,5% | 102,5% | 100,0% | 95,6%   |
| 23:00 | 48,0%                      | 26,8% | 13,8% | 10,1% | 1,3%    | 49,3%                       | 26,0% | 13,4% | 10,0% | 1,3%    | -1,3%                         | 0,8%  | 0,4%  | 0,1%  | 0,0%    | 97,4%                  | 103,2% | 102,9% | 101,0% | 96,4%   |

Table A14: Descriptive statistics for December.

| Time  | Static population (shares) |       |       |       |         | Dynamic population (shares) |       |       |       |         | Difference (Static - Dynamic) |       |       |       |         | Ratio (Static/Dynamic) |        |        |        |         |
|-------|----------------------------|-------|-------|-------|---------|-----------------------------|-------|-------|-------|---------|-------------------------------|-------|-------|-------|---------|------------------------|--------|--------|--------|---------|
|       | 0-10                       | 10-20 | 20-30 | 30-60 | Over 60 | 0-10                        | 10-20 | 20-30 | 30-60 | Over 60 | 0-10                          | 10-20 | 20-30 | 30-60 | Over 60 | 0-10                   | 10-20  | 20-30  | 30-60  | Over 60 |
| 00:00 | 48,0%                      | 26,8% | 13,8% | 10,1% | 1,3%    | 48,2%                       | 26,2% | 13,6% | 10,3% | 1,8%    | -0,2%                         | 0,6%  | 0,2%  | -0,2% | -0,5%   | 99,6%                  | 102,4% | 101,6% | 98,3%  | 73,3%   |
| 01:00 | 48,0%                      | 26,8% | 13,8% | 10,1% | 1,3%    | 48,3%                       | 26,5% | 13,6% | 10,0% | 1,6%    | -0,3%                         | 0,3%  | 0,2%  | 0,0%  | -0,3%   | 99,4%                  | 101,3% | 101,2% | 100,5% | 82,6%   |
| 02:00 | 48,0%                      | 26,8% | 13,8% | 10,1% | 1,3%    | 48,2%                       | 26,5% | 13,7% | 10,1% | 1,6%    | -0,2%                         | 0,3%  | 0,1%  | 0,0%  | -0,3%   | 99,7%                  | 101,3% | 100,9% | 99,7%  | 82,5%   |
| 03:00 | 48,0%                      | 26,8% | 13,8% | 10,1% | 1,3%    | 47,9%                       | 26,6% | 13,8% | 10,2% | 1,6%    | 0,1%                          | 0,3%  | 0,0%  | -0,1% | -0,3%   | 100,2%                 | 101,0% | 100,2% | 98,8%  | 82,3%   |
| 04:00 | 48,0%                      | 26,8% | 13,8% | 10,1% | 1,3%    | 47,7%                       | 26,6% | 13,9% | 10,3% | 1,6%    | 0,3%                          | 0,2%  | 0,0%  | -0,2% | -0,3%   | 100,7%                 | 100,8% | 99,7%  | 98,1%  | 81,8%   |
| 05:00 | 48,0%                      | 26,8% | 13,8% | 10,1% | 1,3%    | 47,6%                       | 26,6% | 13,9% | 10,3% | 1,6%    | 0,4%                          | 0,2%  | -0,1% | -0,2% | -0,3%   | 100,8%                 | 100,8% | 99,4%  | 97,8%  | 81,3%   |
| 06:00 | 48,0%                      | 26,8% | 13,8% | 10,1% | 1,3%    | 48,1%                       | 26,3% | 13,8% | 10,3% | 1,6%    | -0,1%                         | 0,5%  | 0,0%  | -0,2% | -0,3%   | 99,9%                  | 101,9% | 100,2% | 98,2%  | 81,3%   |
| 07:00 | 48,0%                      | 26,8% | 13,8% | 10,1% | 1,3%    | 49,2%                       | 25,7% | 13,5% | 10,1% | 1,6%    | -1,2%                         | 1,1%  | 0,3%  | 0,0%  | -0,3%   | 97,6%                  | 104,4% | 102,5% | 99,8%  | 81,8%   |
| 08:00 | 48,0%                      | 26,8% | 13,8% | 10,1% | 1,3%    | 50,2%                       | 24,9% | 13,2% | 10,0% | 1,6%    | -2,2%                         | 1,9%  | 0,6%  | 0,1%  | -0,3%   | 95,6%                  | 107,6% | 104,3% | 100,6% | 81,9%   |
| 09:00 | 48,0%                      | 26,8% | 13,8% | 10,1% | 1,3%    | 50,8%                       | 24,4% | 13,1% | 10,0% | 1,6%    | -2,8%                         | 2,4%  | 0,7%  | 0,1%  | -0,3%   | 94,5%                  | 109,7% | 105,4% | 100,5% | 80,8%   |
| 10:00 | 48,0%                      | 26,8% | 13,8% | 10,1% | 1,3%    | 51,6%                       | 23,9% | 12,9% | 10,0% | 1,6%    | -3,6%                         | 2,9%  | 0,9%  | 0,1%  | -0,3%   | 93,0%                  | 112,0% | 107,3% | 101,2% | 80,3%   |
| 11:00 | 48,0%                      | 26,8% | 13,8% | 10,1% | 1,3%    | 52,5%                       | 23,5% | 12,6% | 9,9%  | 1,6%    | -4,4%                         | 3,3%  | 1,2%  | 0,2%  | -0,3%   | 91,5%                  | 114,2% | 109,4% | 102,3% | 80,7%   |
| 12:00 | 48,0%                      | 26,8% | 13,8% | 10,1% | 1,3%    | 52,9%                       | 23,2% | 12,5% | 9,8%  | 1,6%    | -4,9%                         | 3,6%  | 1,3%  | 0,3%  | -0,3%   | 90,7%                  | 115,7% | 110,7% | 103,0% | 80,6%   |
| 13:00 | 48,0%                      | 26,8% | 13,8% | 10,1% | 1,3%    | 53,0%                       | 23,1% | 12,5% | 9,8%  | 1,6%    | -5,0%                         | 3,7%  | 1,3%  | 0,3%  | -0,3%   | 90,6%                  | 115,9% | 110,8% | 102,9% | 80,1%   |
| 14:00 | 48,0%                      | 26,8% | 13,8% | 10,1% | 1,3%    | 52,8%                       | 23,3% | 12,5% | 9,8%  | 1,6%    | -4,8%                         | 3,6%  | 1,3%  | 0,3%  | -0,3%   | 90,9%                  | 115,3% | 110,5% | 102,8% | 79,6%   |
| 15:00 | 48,0%                      | 26,8% | 13,8% | 10,1% | 1,3%    | 52,2%                       | 23,6% | 12,7% | 9,9%  | 1,6%    | -4,2%                         | 3,2%  | 1,2%  | 0,2%  | -0,3%   | 92,0%                  | 113,5% | 109,1% | 101,9% | 78,7%   |
| 16:00 | 48,0%                      | 26,8% | 13,8% | 10,1% | 1,3%    | 51,1%                       | 24,2% | 12,9% | 10,0% | 1,7%    | -3,1%                         | 2,6%  | 0,9%  | 0,0%  | -0,4%   | 93,9%                  | 110,7% | 106,6% | 100,3% | 77,6%   |
| 17:00 | 48,0%                      | 26,8% | 13,8% | 10,1% | 1,3%    | 50,1%                       | 24,8% | 13,2% | 10,2% | 1,7%    | -2,1%                         | 2,0%  | 0,6%  | -0,1% | -0,4%   | 95,8%                  | 108,2% | 104,4% | 98,9%  | 76,4%   |
| 18:00 | 48,0%                      | 26,8% | 13,8% | 10,1% | 1,3%    | 49,3%                       | 25,2% | 13,4% | 10,3% | 1,7%    | -1,3%                         | 1,6%  | 0,4%  | -0,3% | -0,4%   | 97,4%                  | 106,4% | 102,7% | 97,4%  | 75,2%   |
| 19:00 | 48,0%                      | 26,8% | 13,8% | 10,1% | 1,3%    | 48,7%                       | 25,5% | 13,6% | 10,5% | 1,7%    | -0,7%                         | 1,3%  | 0,2%  | -0,4% | -0,4%   | 98,7%                  | 105,1% | 101,4% | 96,3%  | 74,1%   |
| 20:00 | 48,0%                      | 26,8% | 13,8% | 10,1% | 1,3%    | 48,3%                       | 25,7% | 13,7% | 10,5% | 1,8%    | -0,3%                         | 1,1%  | 0,1%  | -0,4% | -0,5%   | 99,4%                  | 104,2% | 100,8% | 95,9%  | 73,5%   |
| 21:00 | 48,0%                      | 26,8% | 13,8% | 10,1% | 1,3%    | 48,1%                       | 25,9% | 13,7% | 10,5% | 1,8%    | -0,1%                         | 0,9%  | 0,1%  | -0,4% | -0,5%   | 99,8%                  | 103,5% | 100,5% | 95,9%  | 73,2%   |
| 22:00 | 48,0%                      | 26,8% | 13,8% | 10,1% | 1,3%    | 48,0%                       | 26,1% | 13,7% | 10,4% | 1,8%    | 0,0%                          | 0,7%  | 0,1%  | -0,4% | -0,5%   | 99,9%                  | 102,9% | 100,7% | 96,6%  | 73,4%   |
| 23:00 | 48,0%                      | 26,8% | 13,8% | 10,1% | 1,3%    | 48,2%                       | 26,1% | 13,6% | 10,3% | 1,7%    | -0,2%                         | 0,7%  | 0,2%  | -0,2% | -0,5%   | 99,6%                  | 102,7% | 101,3% | 97,6%  | 73,8%   |
